# Supplementary material
Source: ML conference proceedings conference paper supplement (https://openreview.net/forum?id=7p0CXGZsrAy)

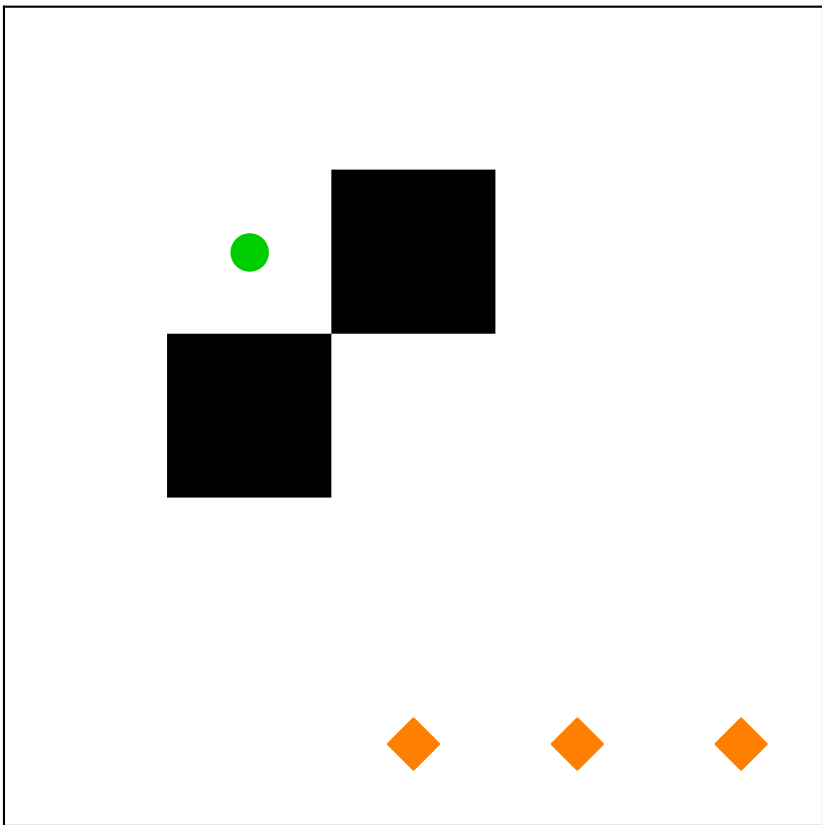

Supplement: supplementary_material [file attachment]

Average of  $f(Q) - \widetilde{Q}^*$  as a function of reward density

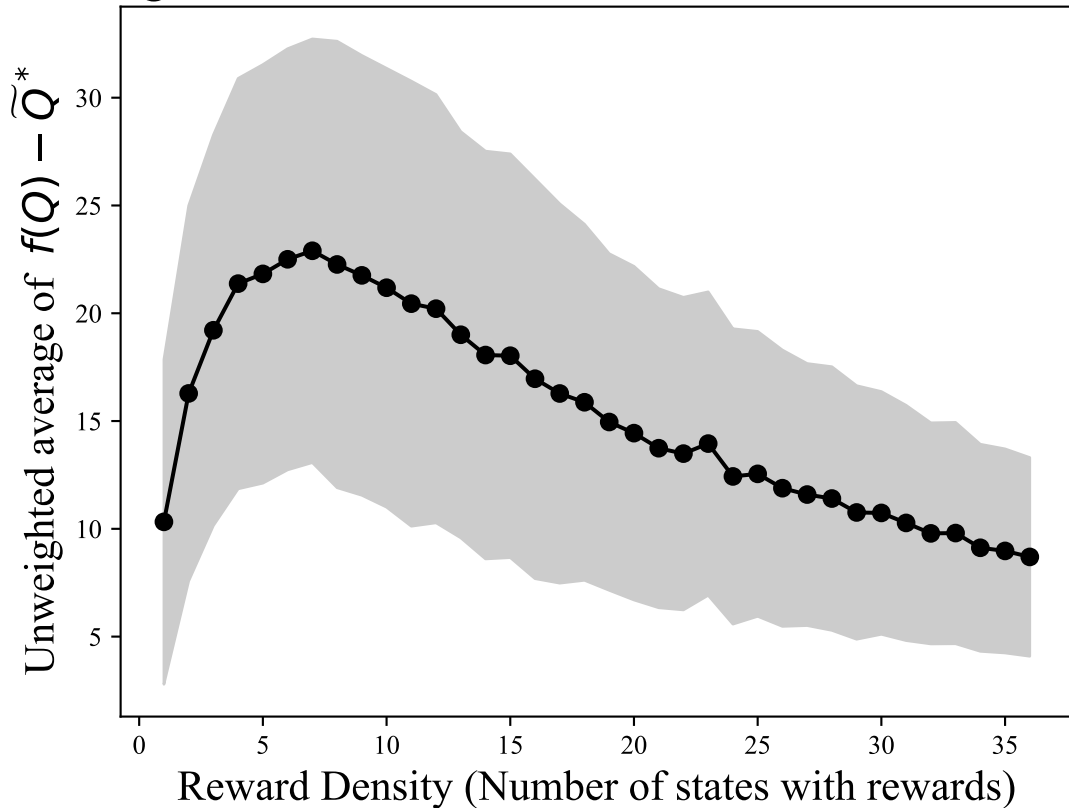

Supplement: supplementary_material [file attachment]

# Stochasticity Experiment For $\beta = \inf$

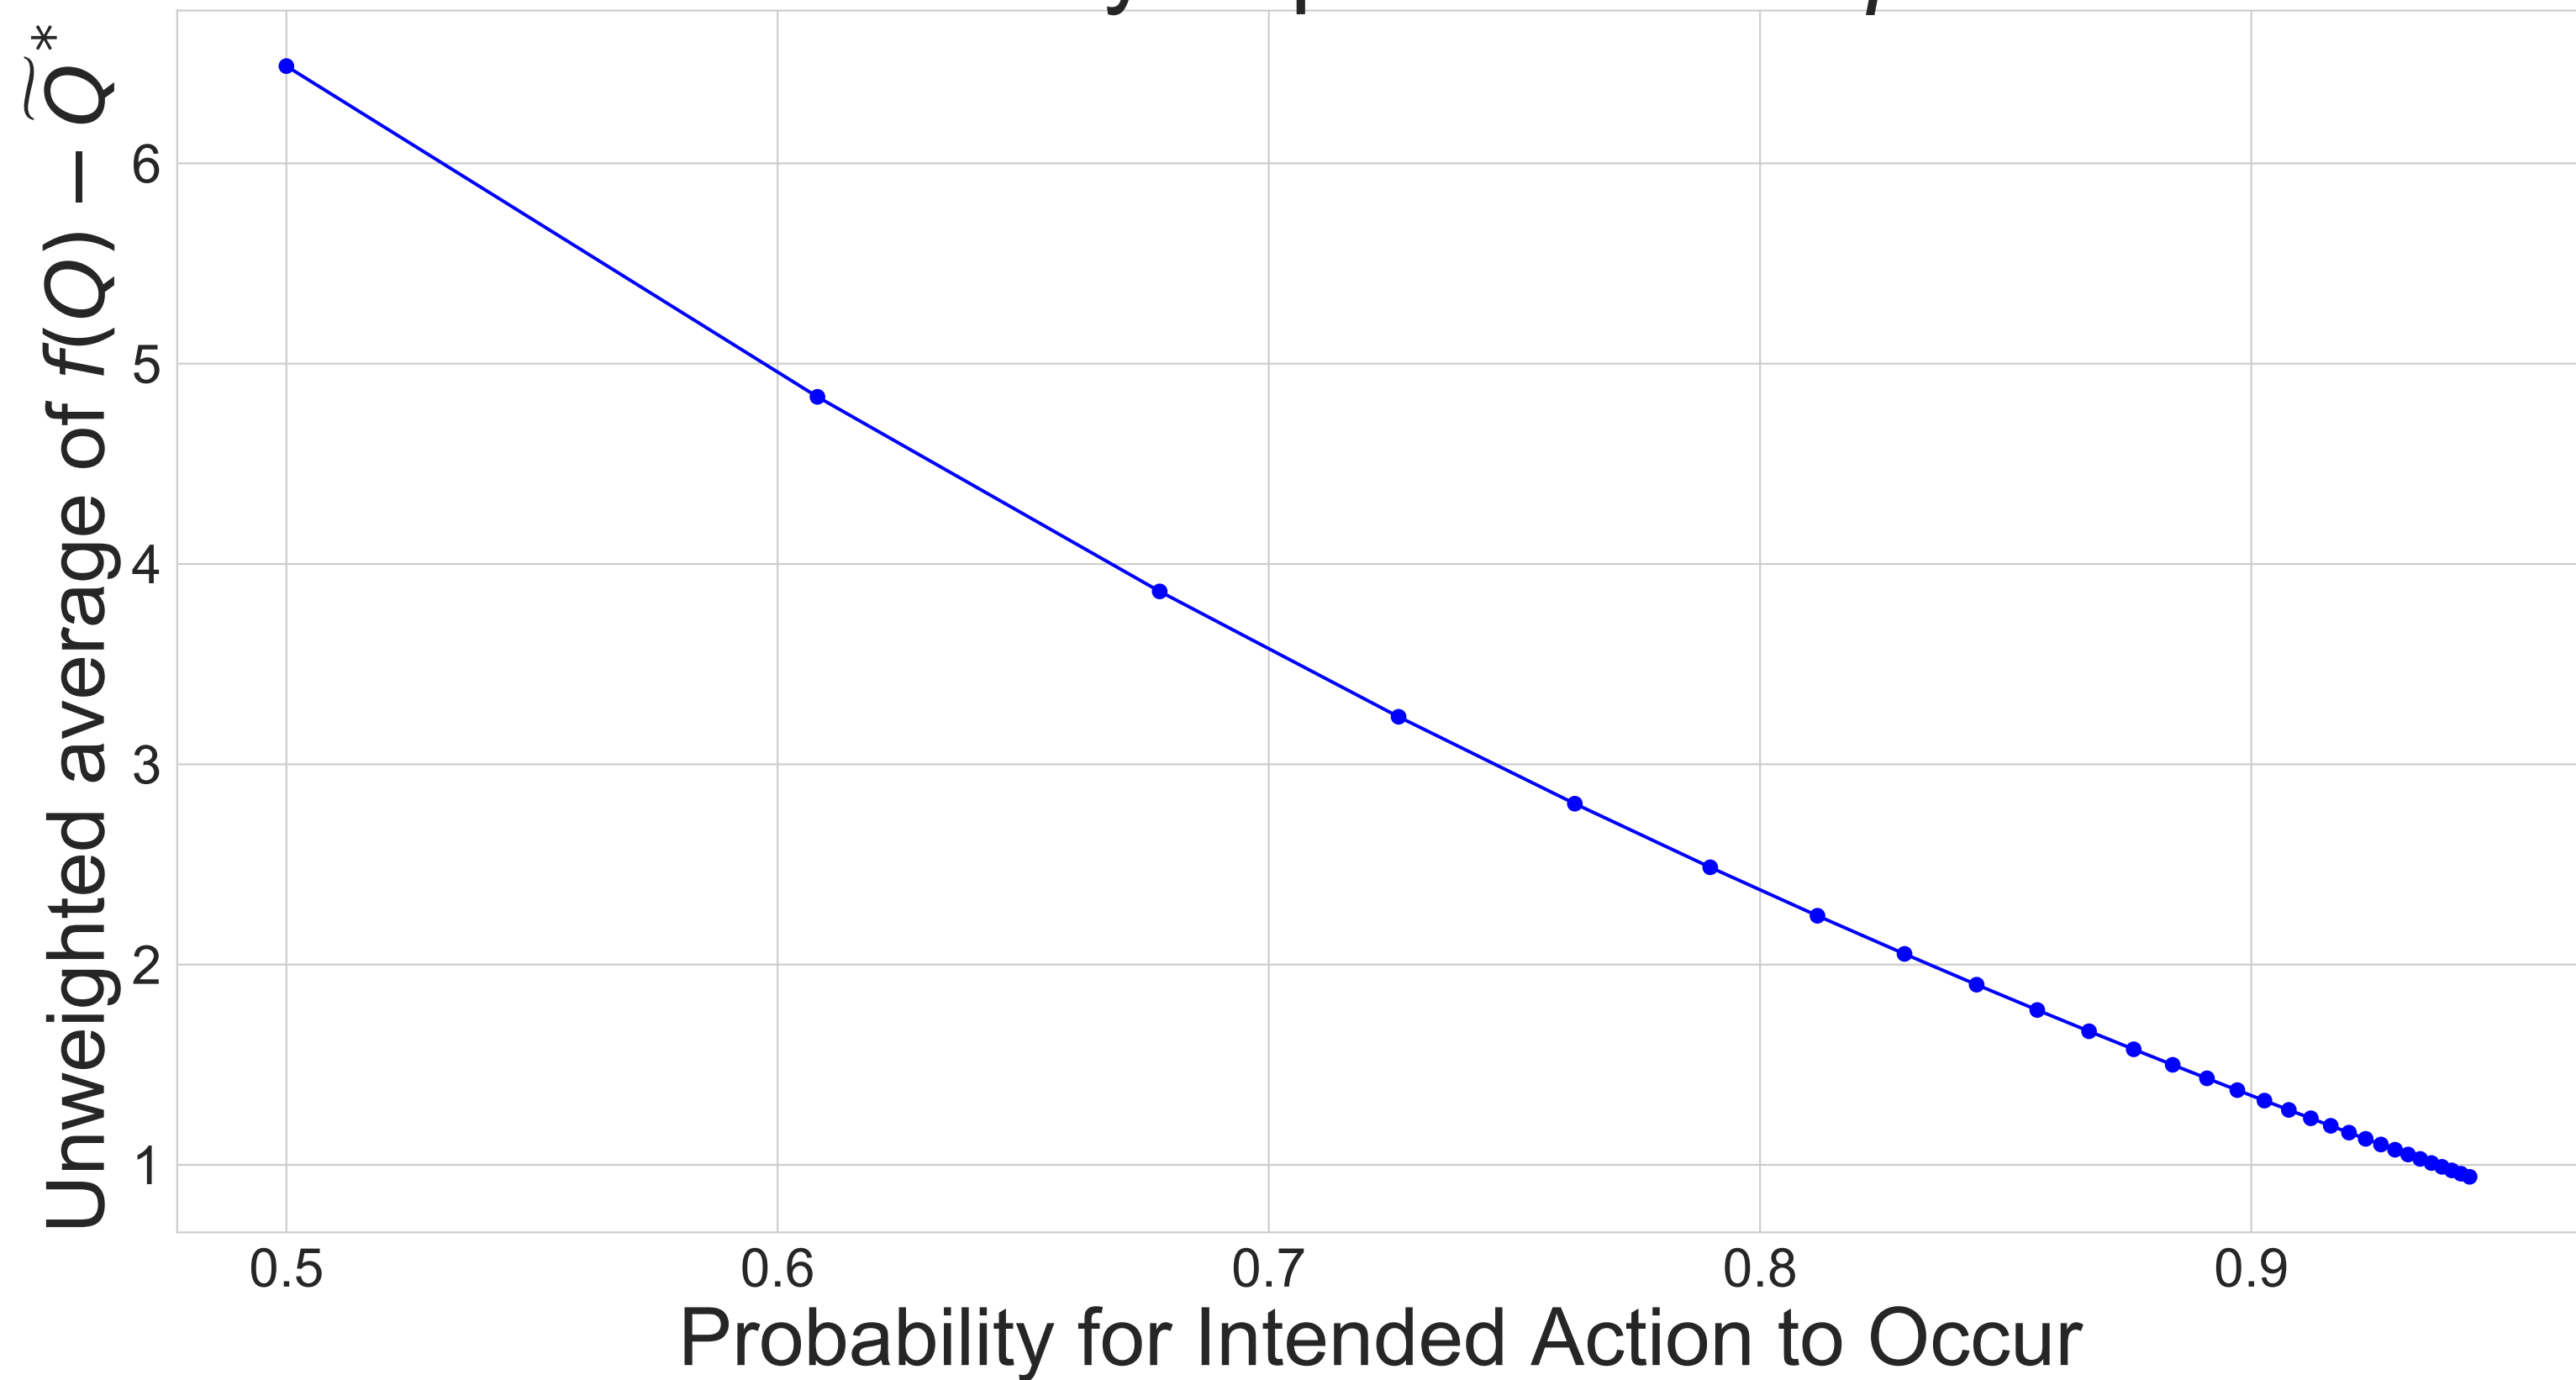

Supplement: supplementary_material [file attachment]

# Task: "6x6L OR D"

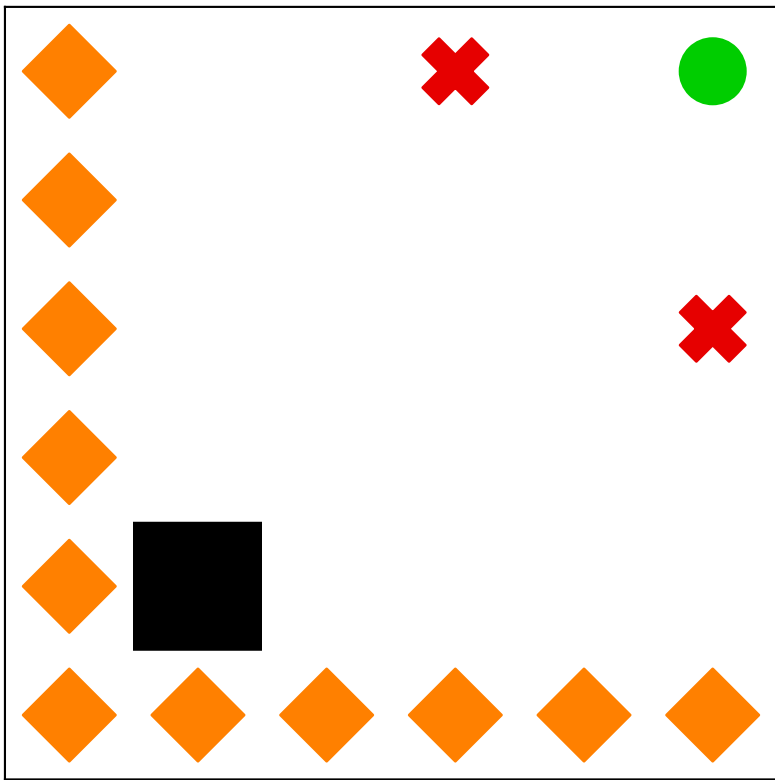

Supplement: supplementary_material [file attachment]

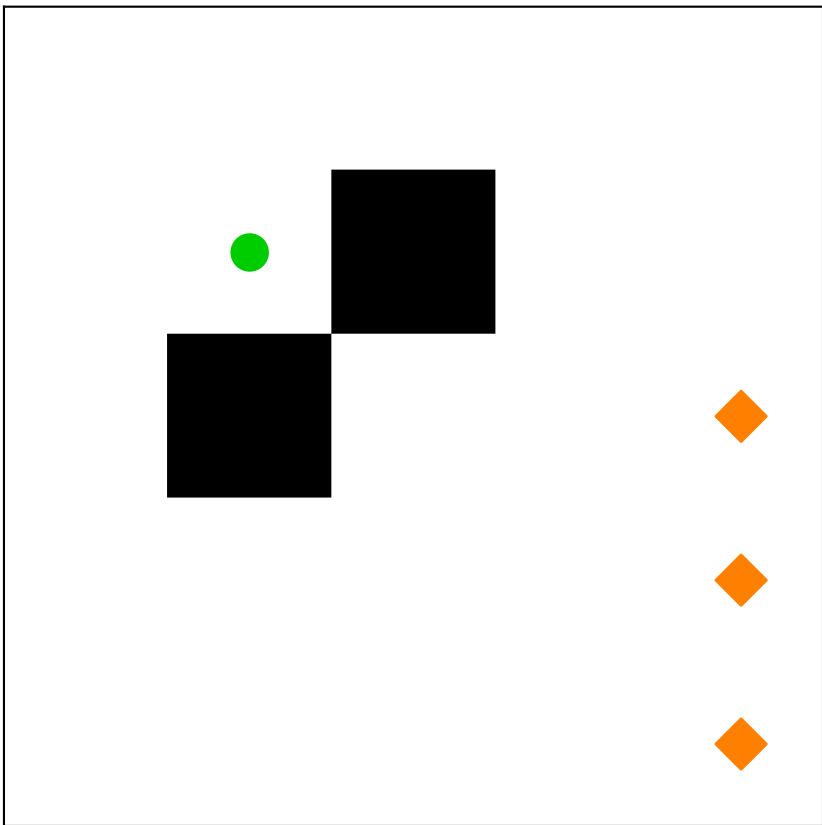

Supplement: supplementary_material [file attachment]

# Error During Training

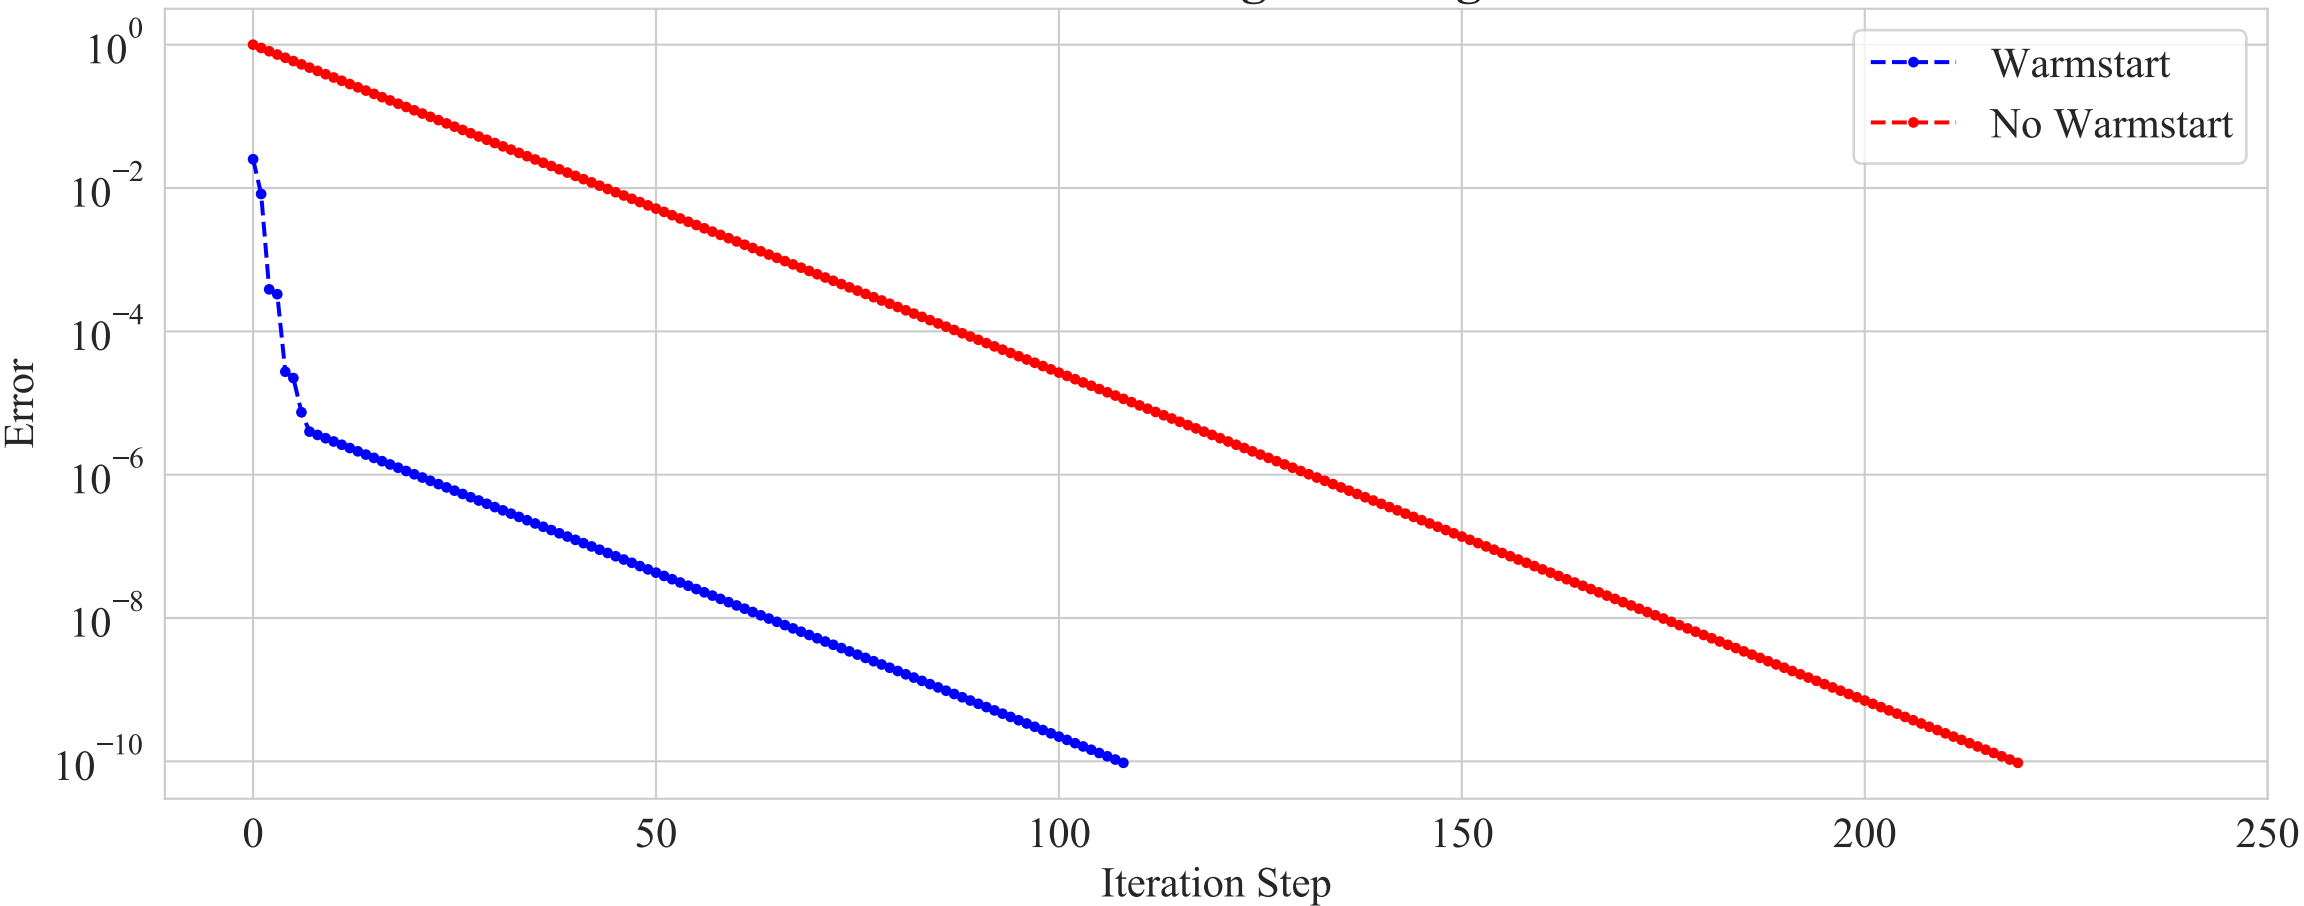

Supplement: supplementary_material [file attachment]

# Evaluation Rewards During Training

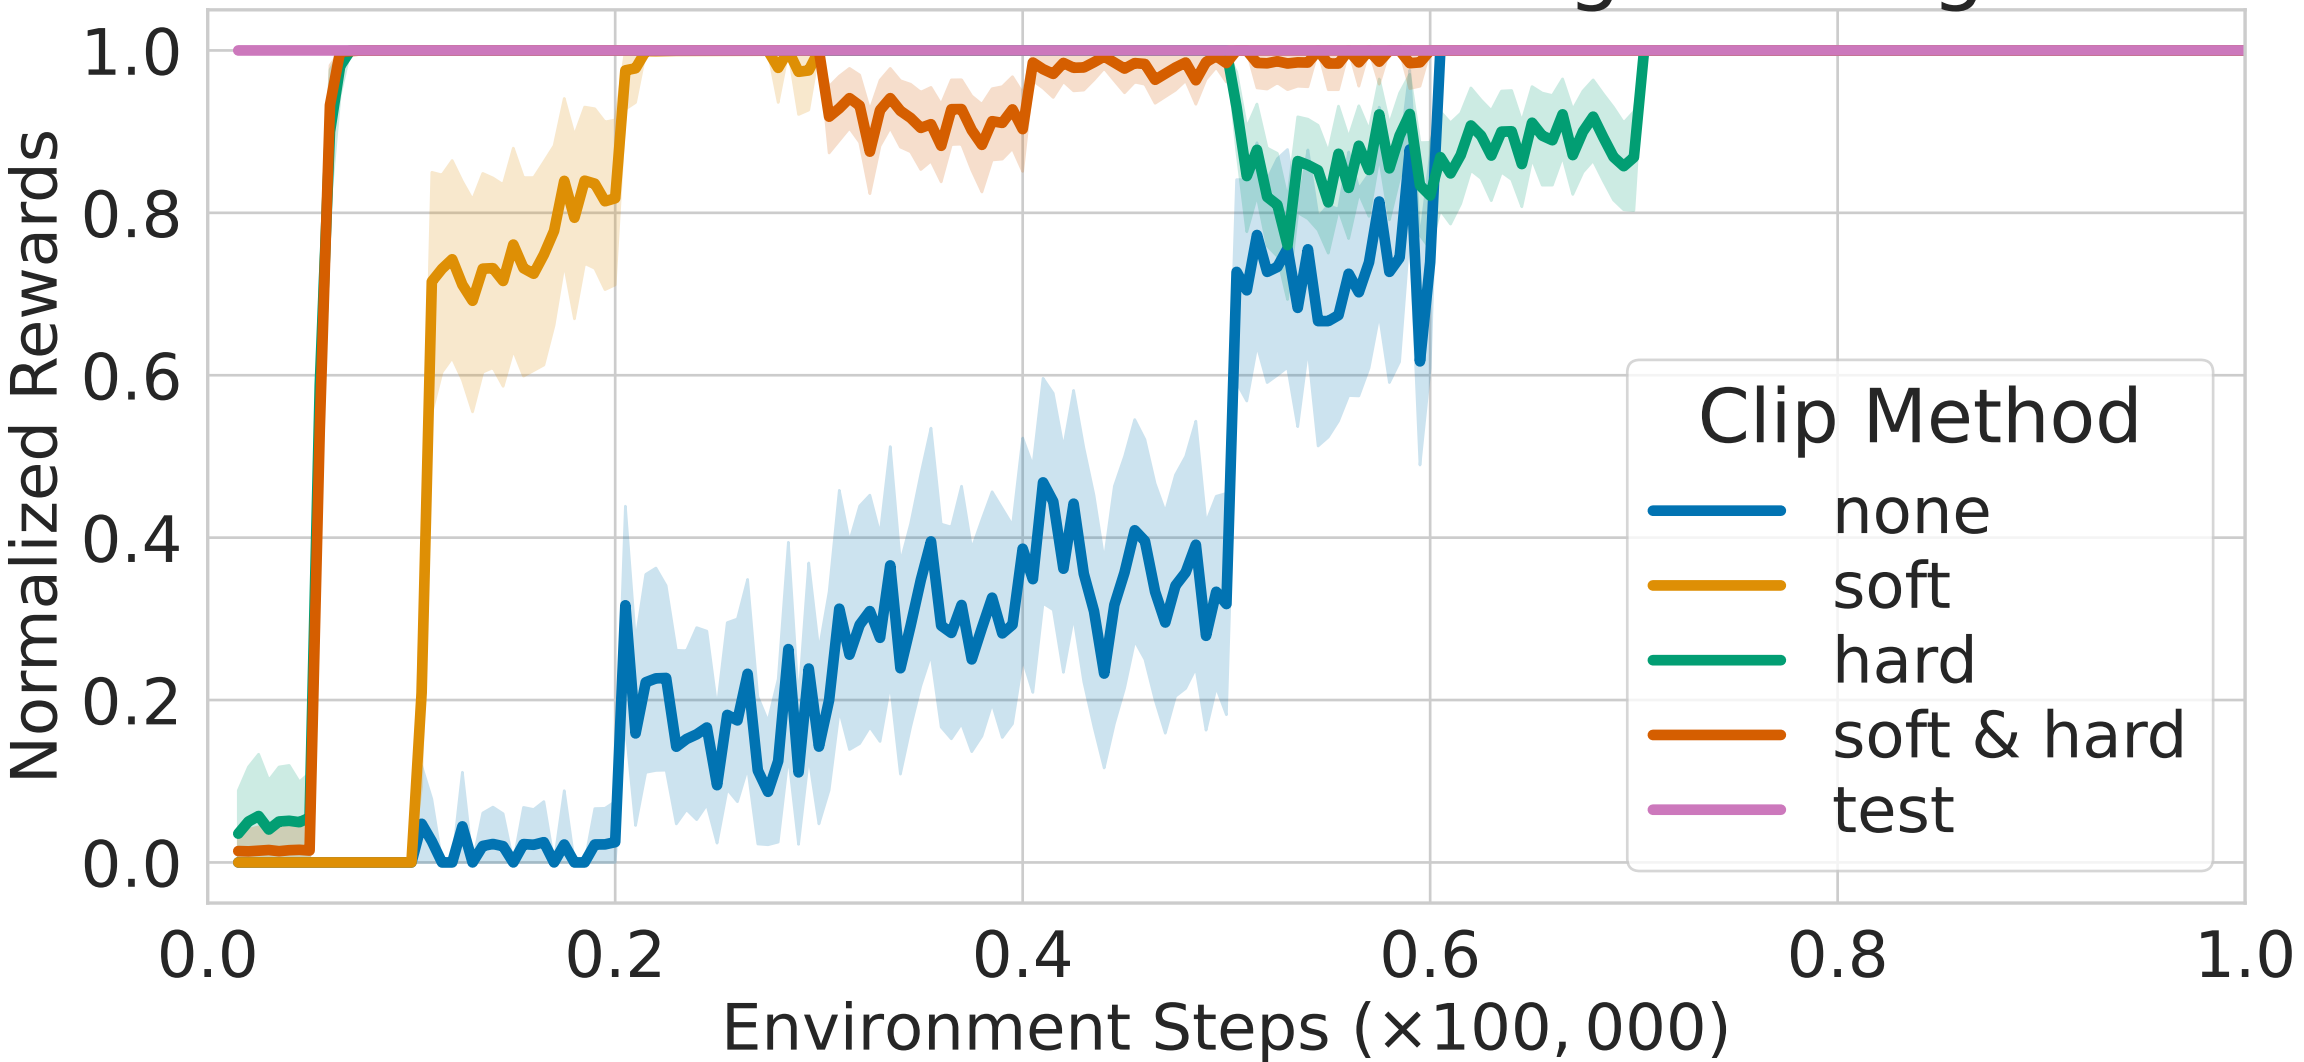

Supplement: supplementary_material [file attachment]

# Stochasticity Experiment For $\beta = 1$

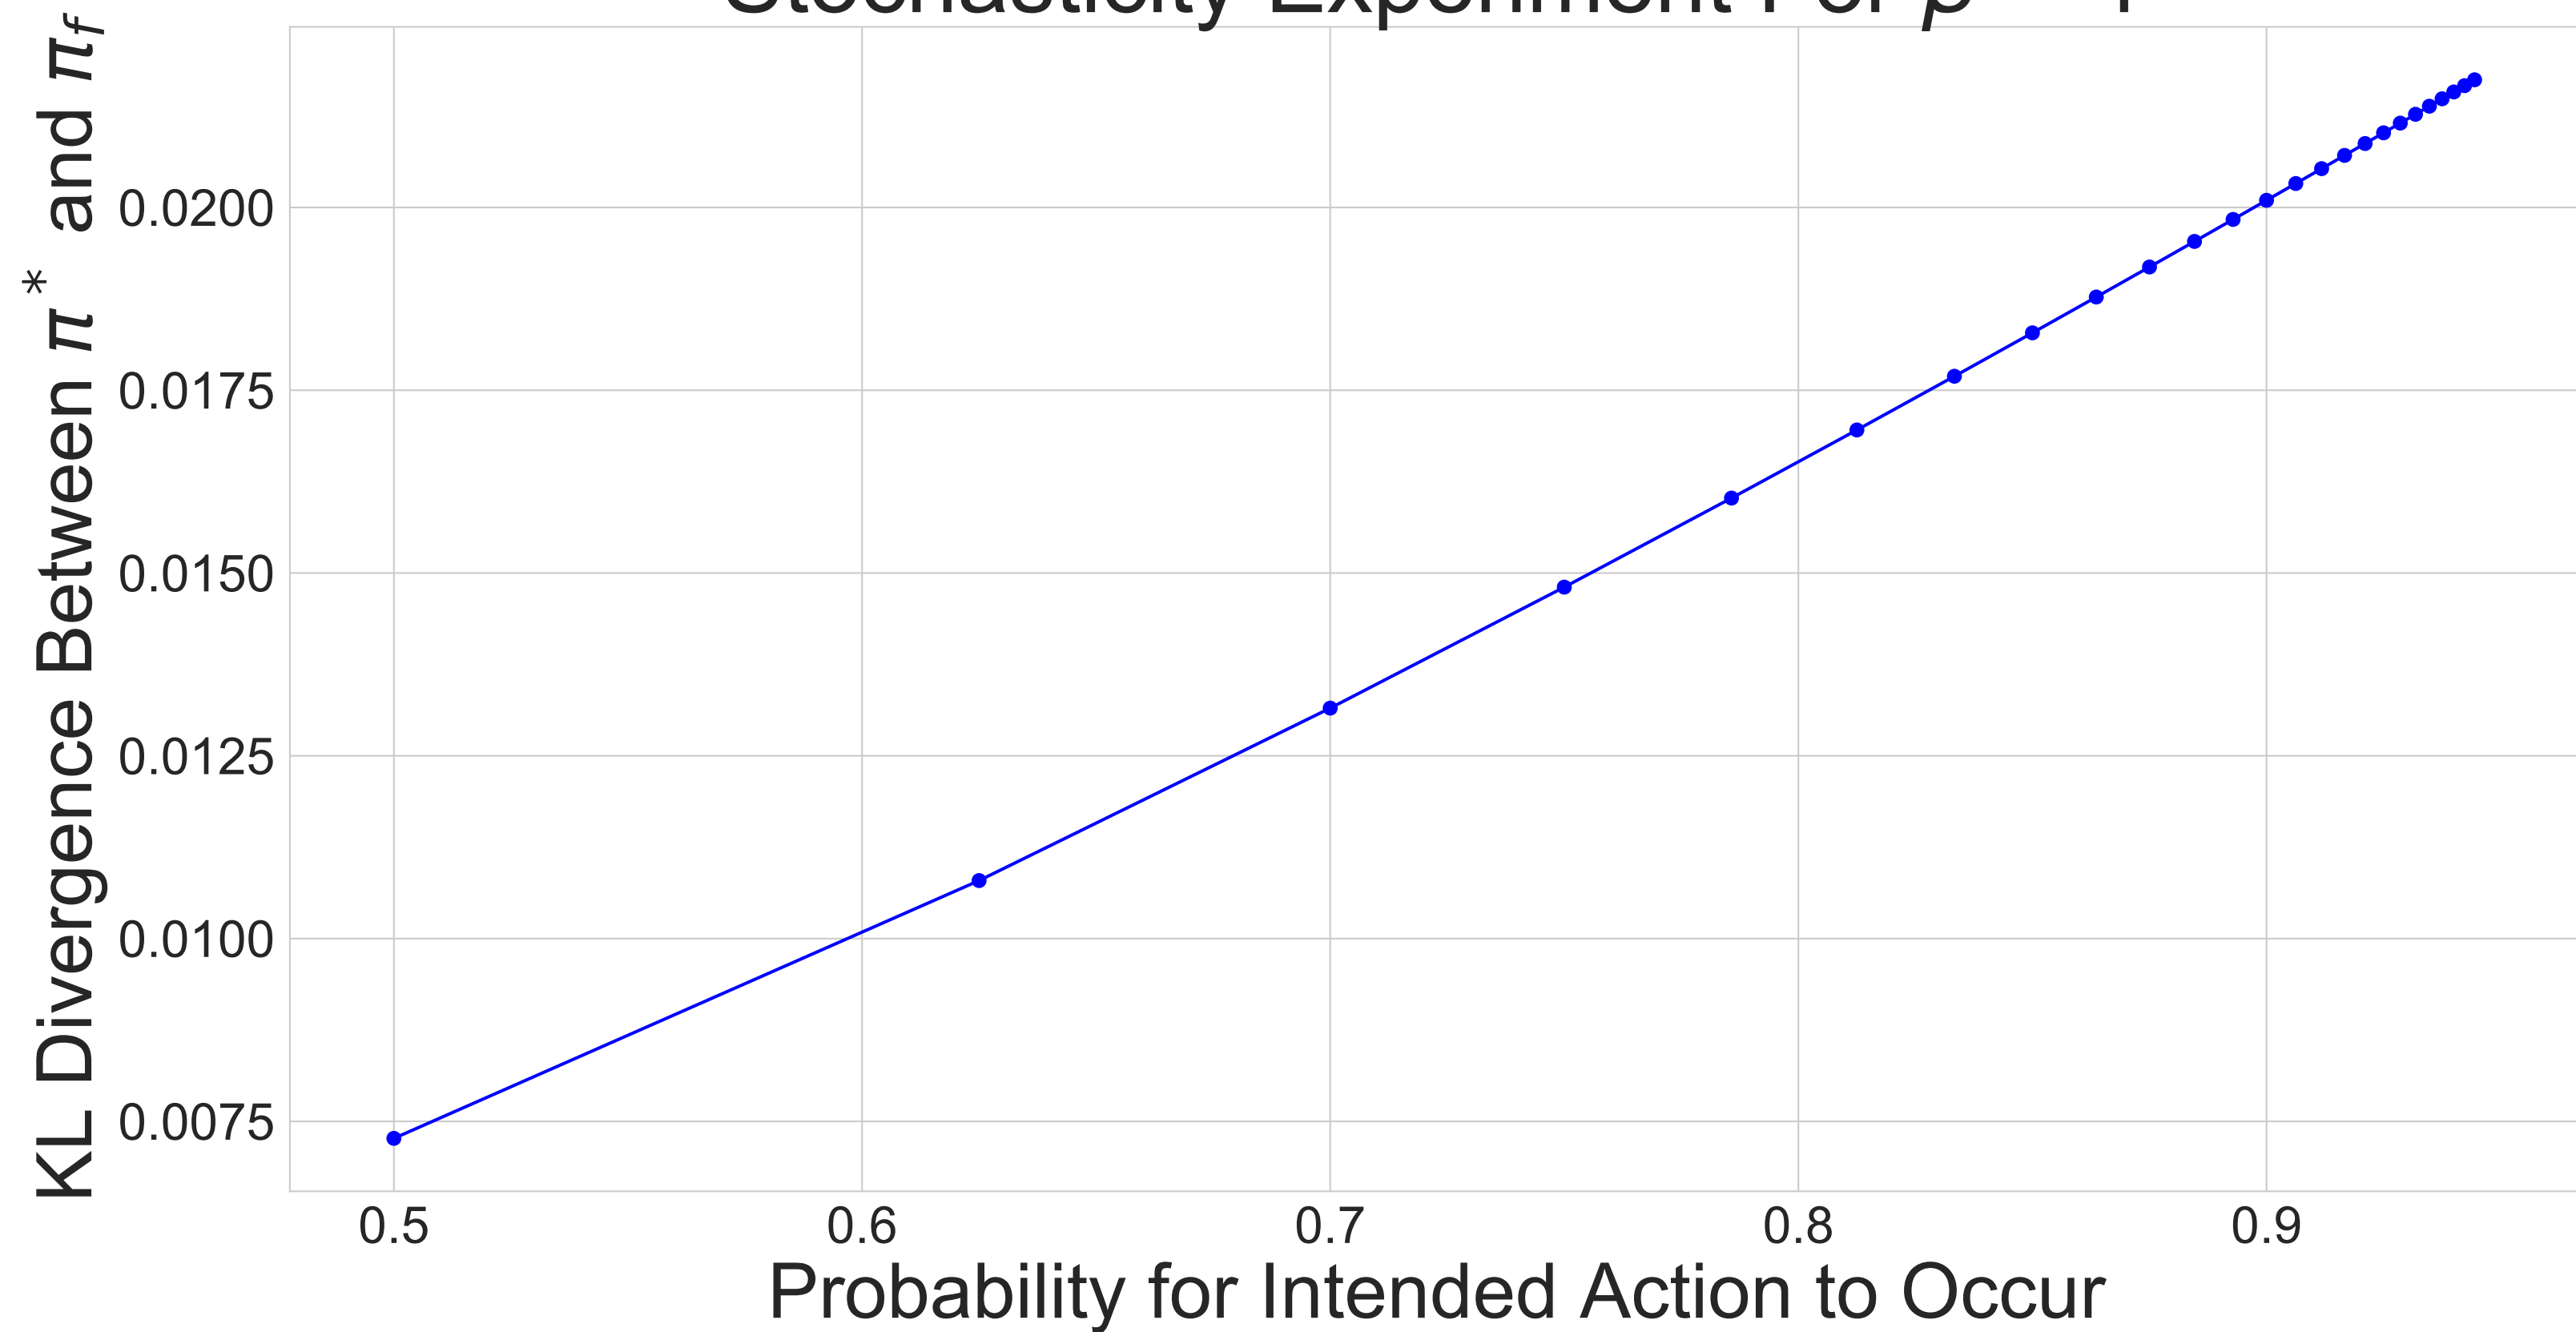

Supplement: supplementary_material [file attachment]

# OR Composition: Standard RL

New Reward Function

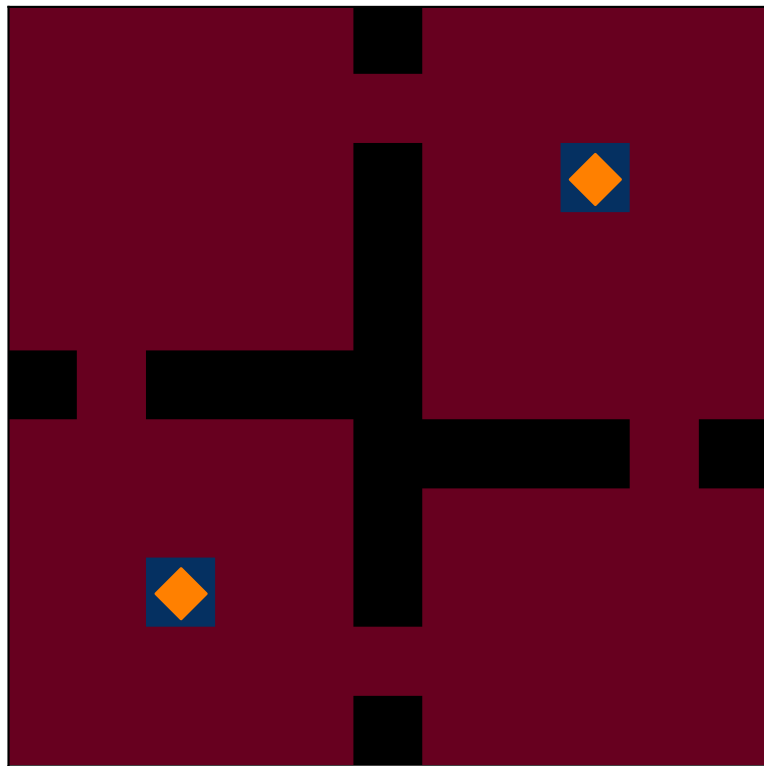

Zero-Shot Approximation

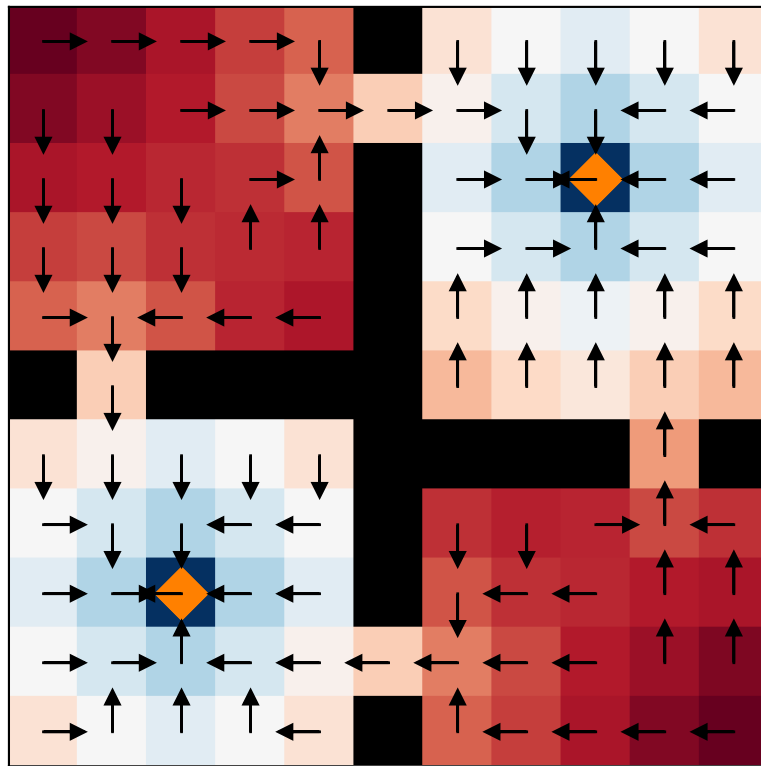

Optimal Solution

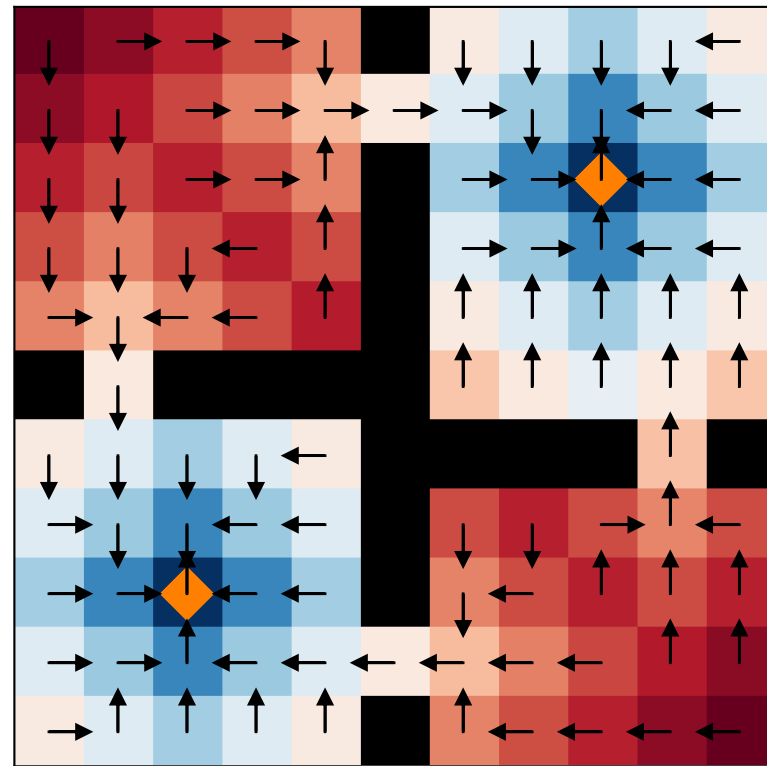

Supplement: supplementary_material [file attachment]

# Stochasticity Experiment For $\beta = 3$

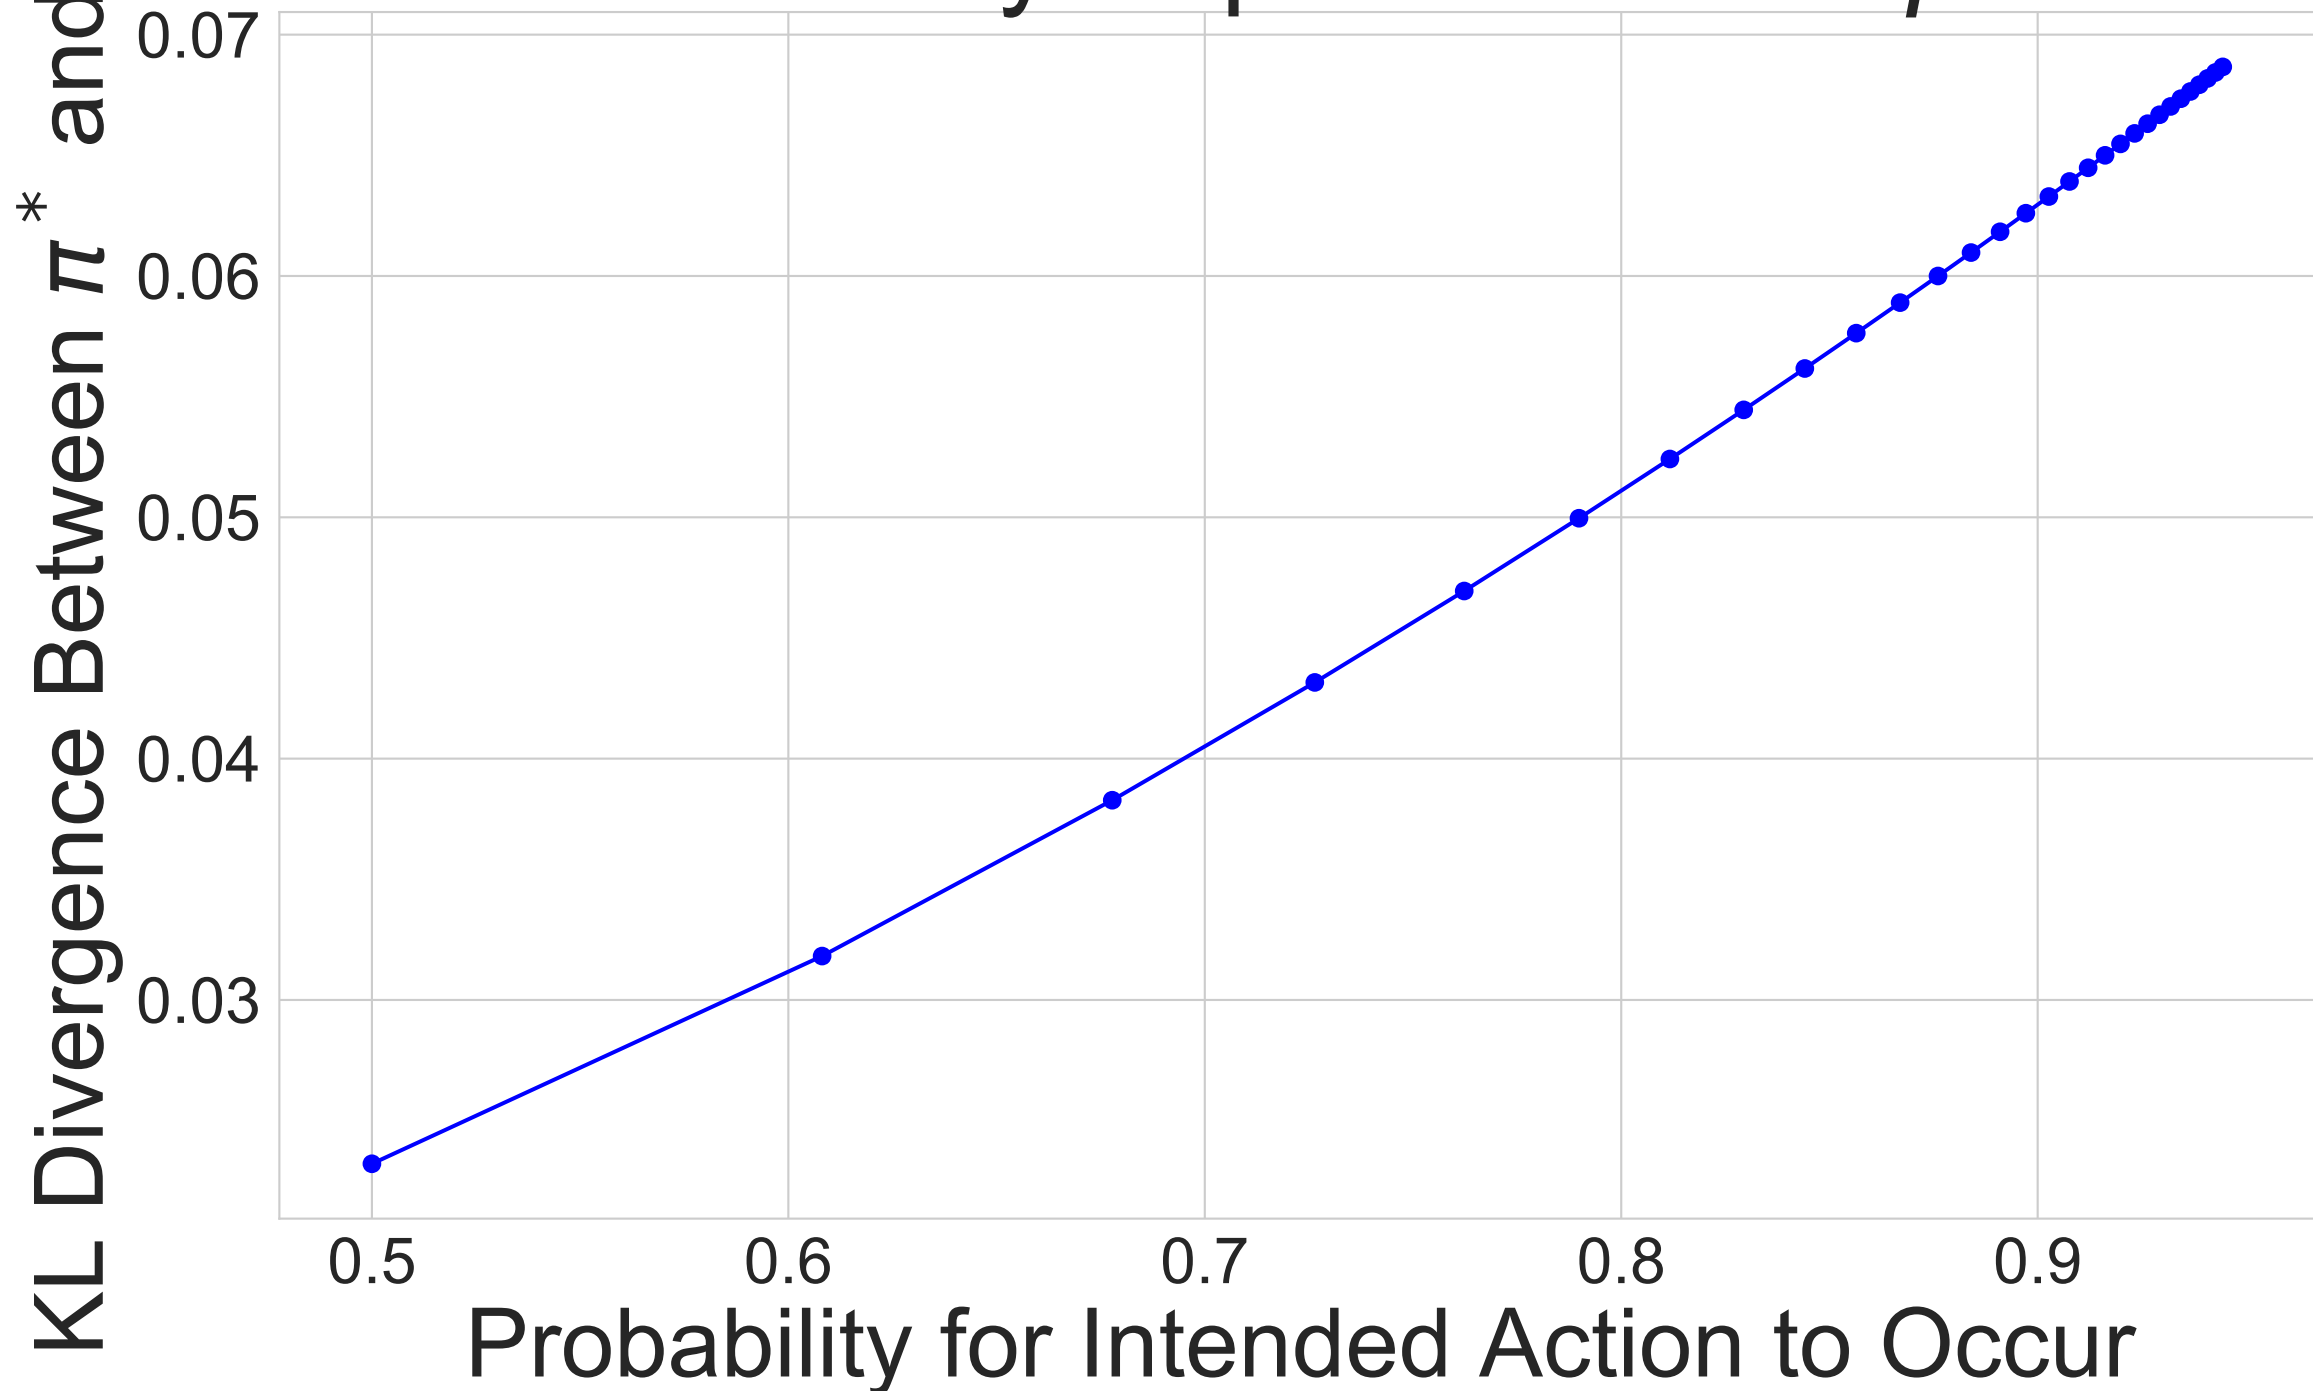

Supplement: supplementary_material [file attachment]

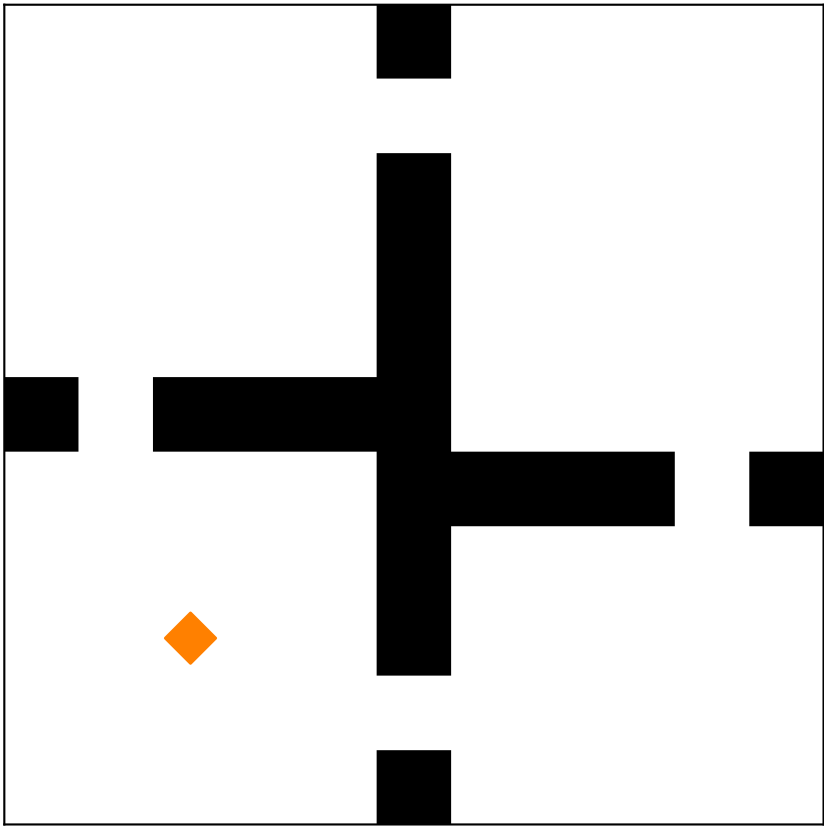

Supplement: supplementary_material [file attachment]

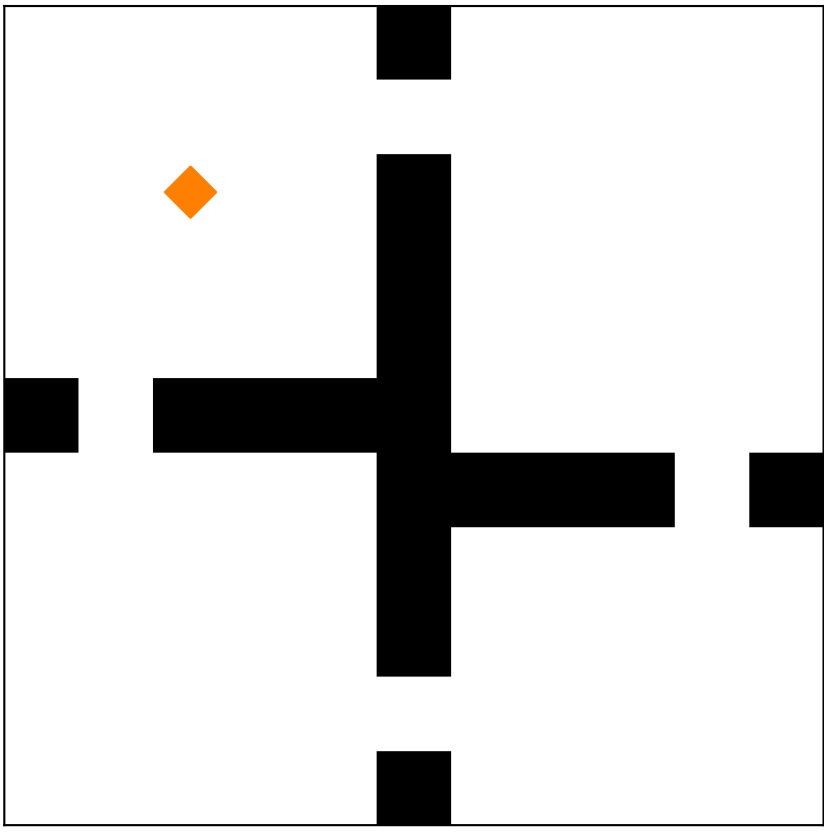

Supplement: supplementary_material [file attachment]

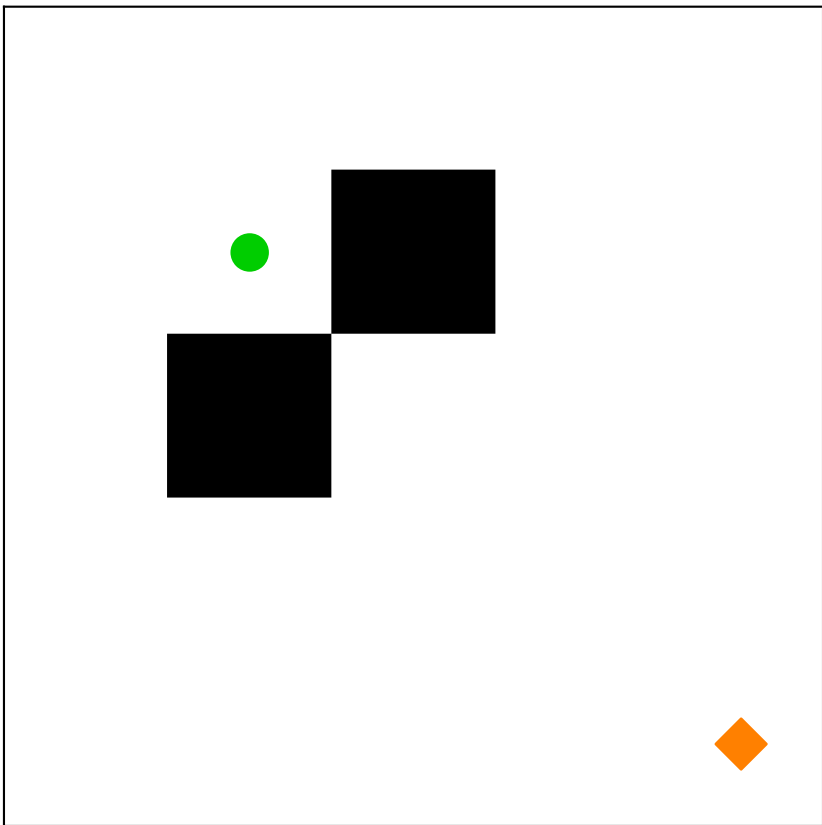

Supplement: supplementary_material [file attachment]

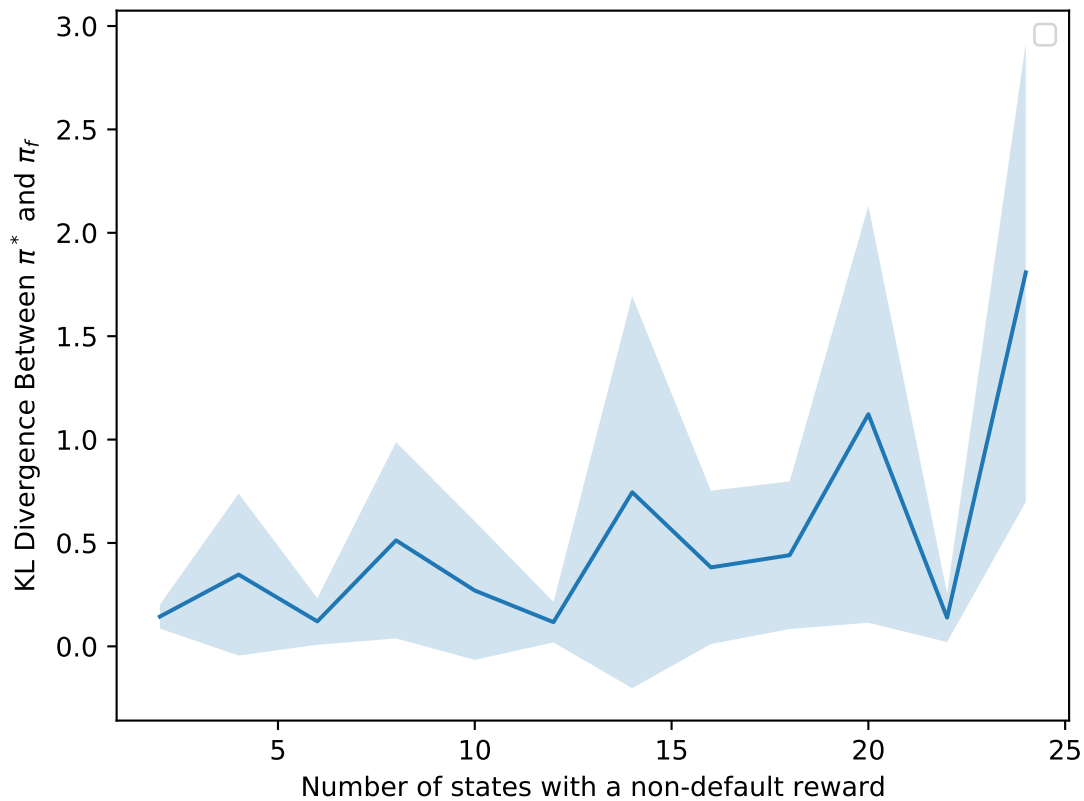

Supplement: supplementary_material [file attachment]

# Stochasticity Experiment For $\beta = 1$

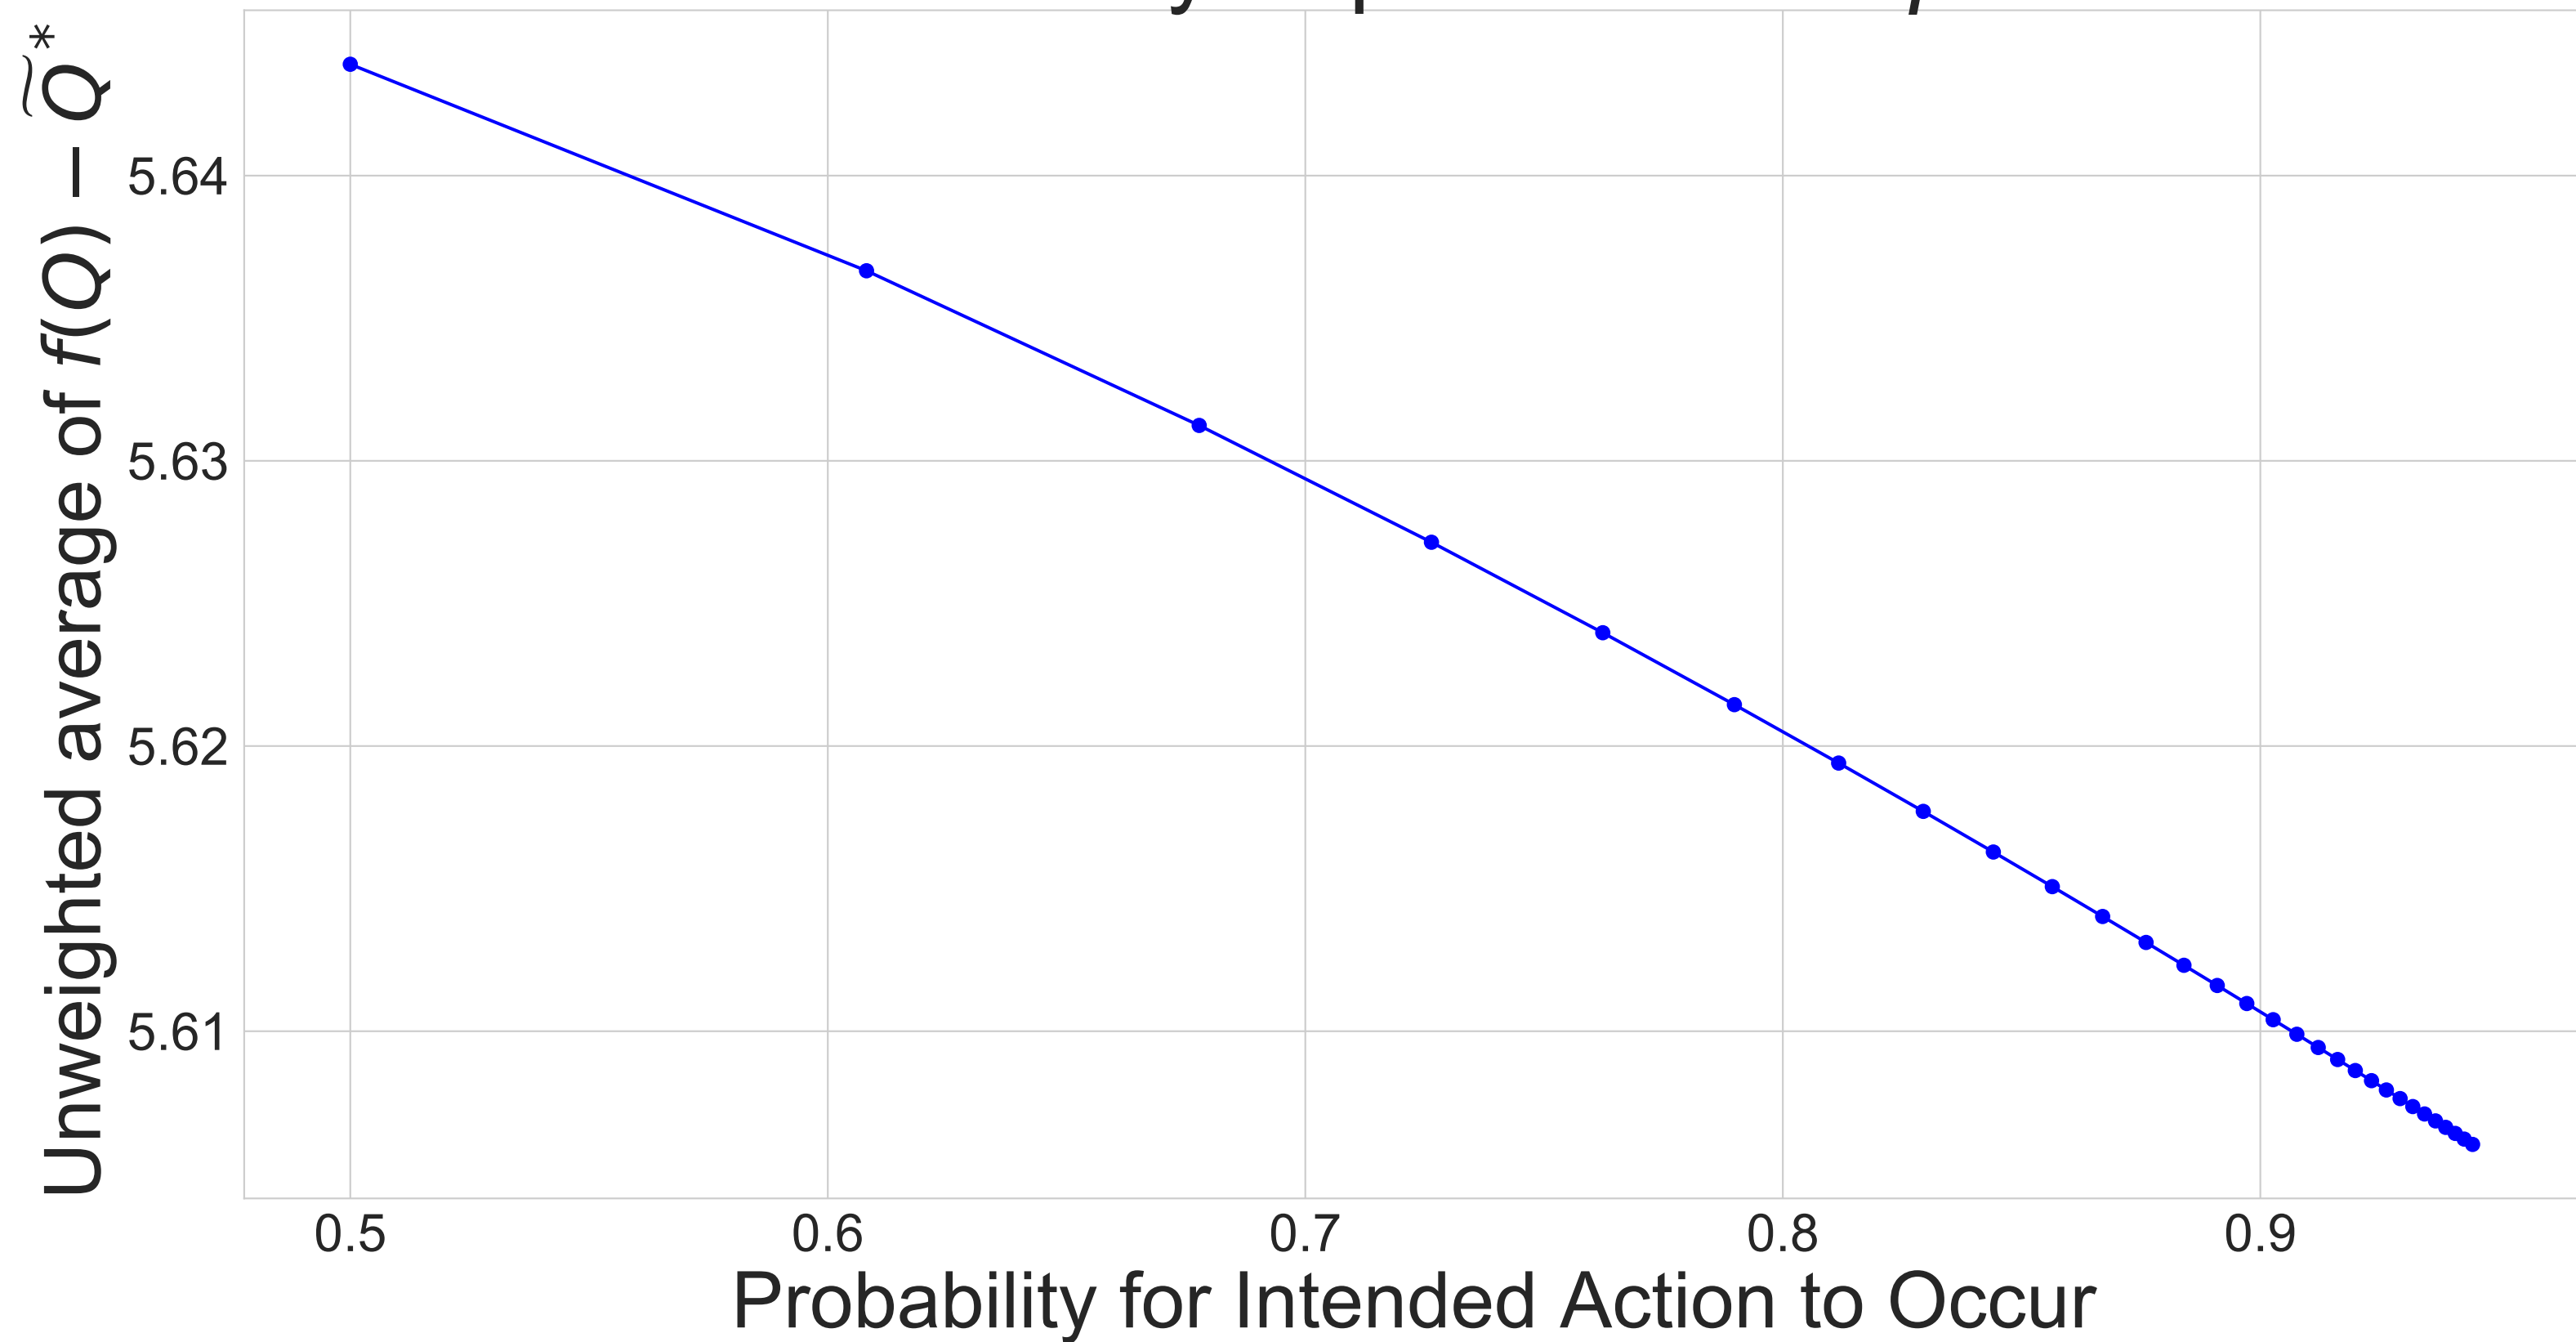

Supplement: supplementary_material [file attachment]

# OR Composition: MaxEnt RL

## New Reward Function

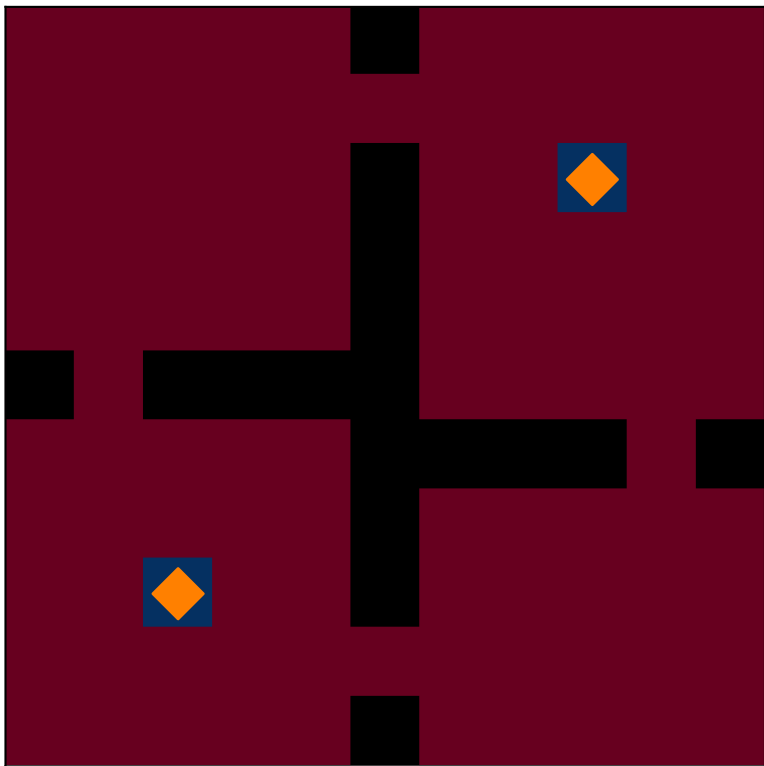

## Zero-Shot Approximation

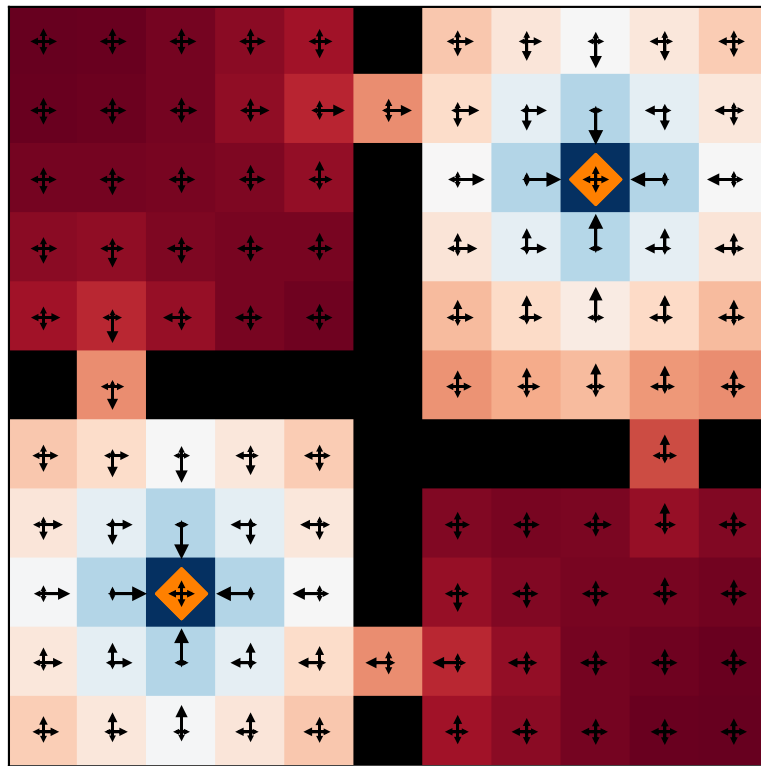

## Optimal Solution

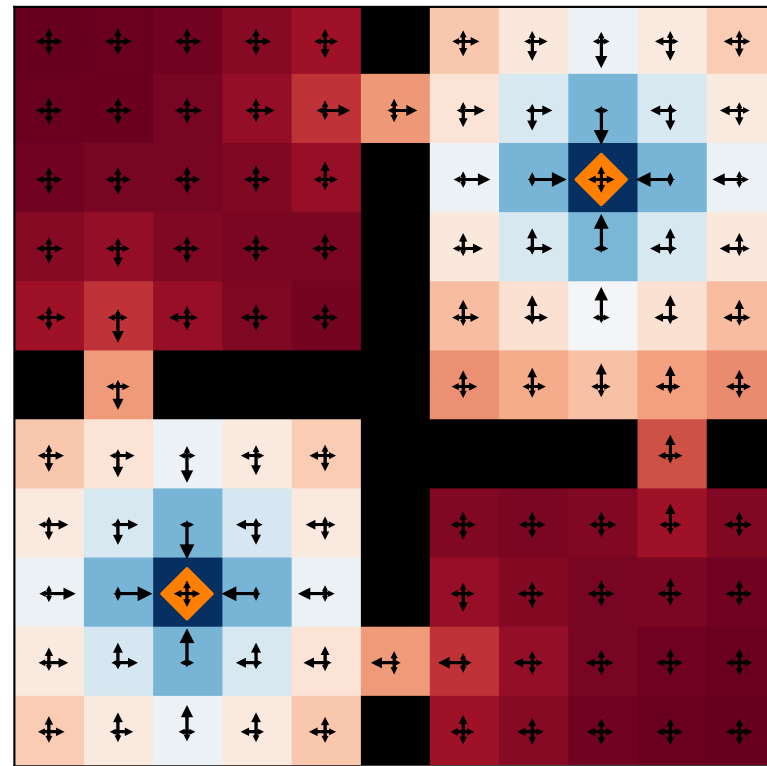

Supplement: supplementary_material [file attachment]

# Bound Violations During Training

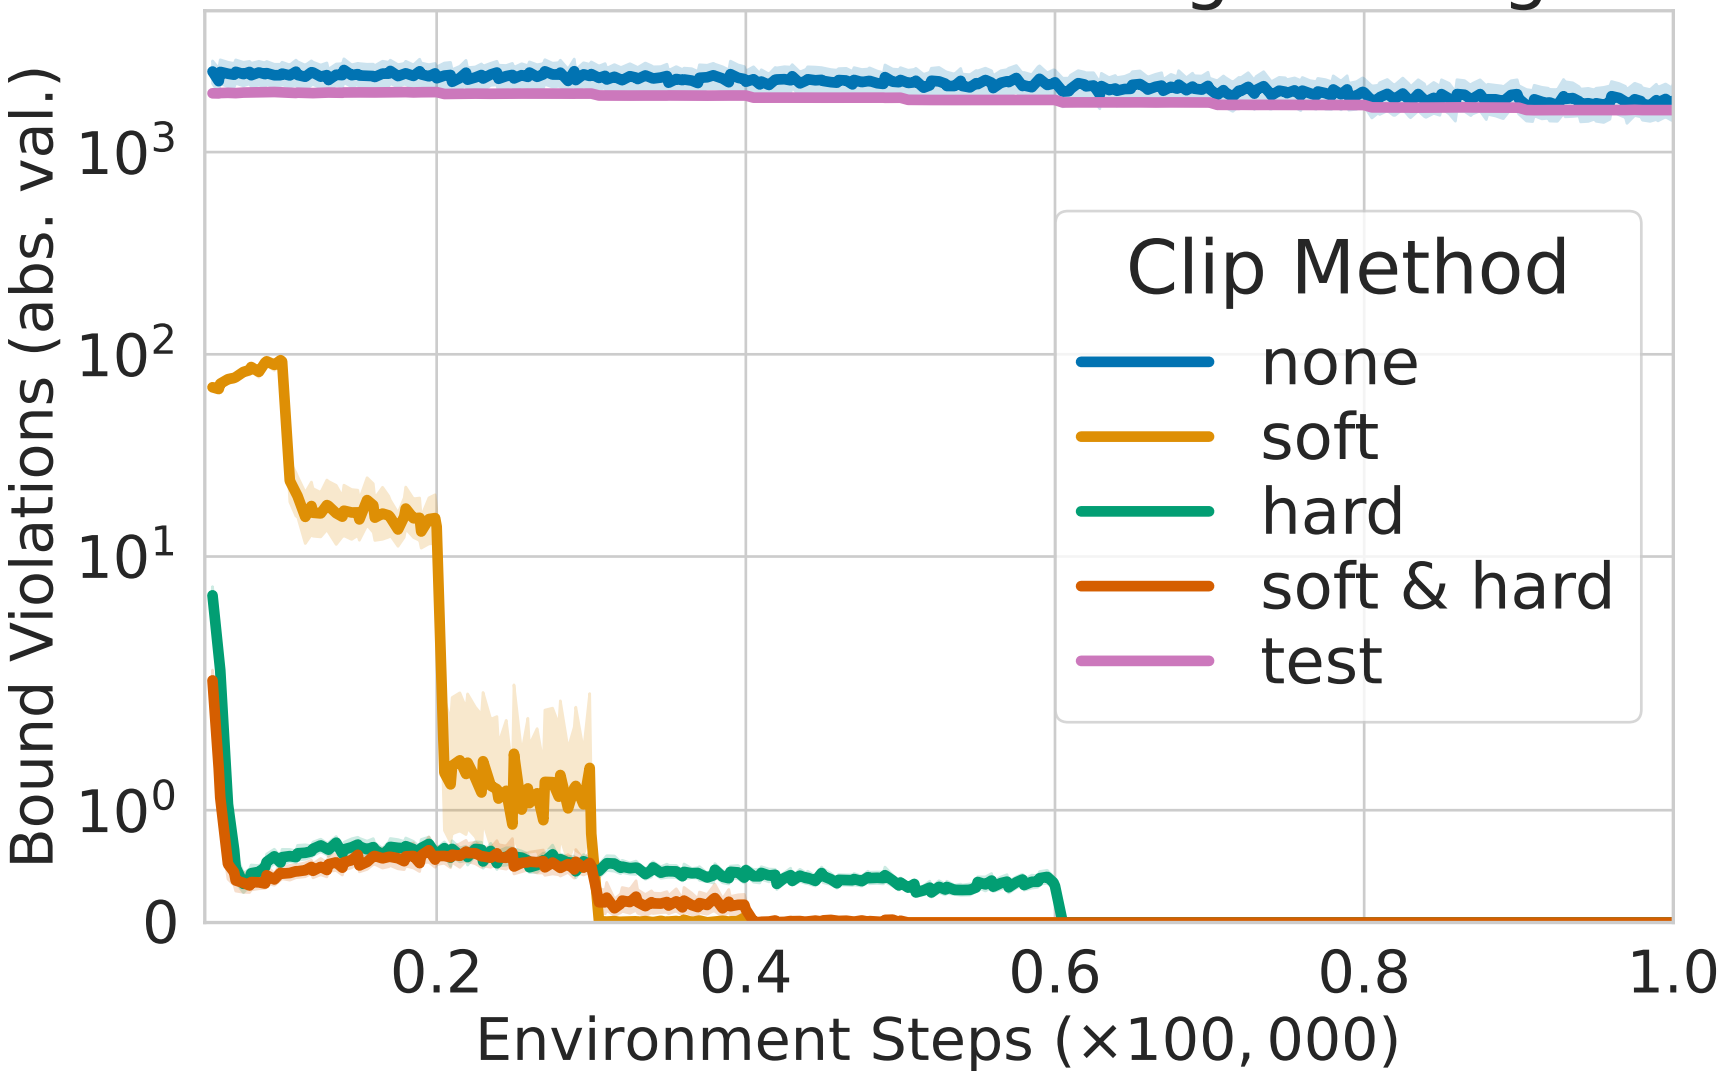

Supplement: supplementary_material [file attachment]

# Stochasticity Experiment For $\beta = 5$

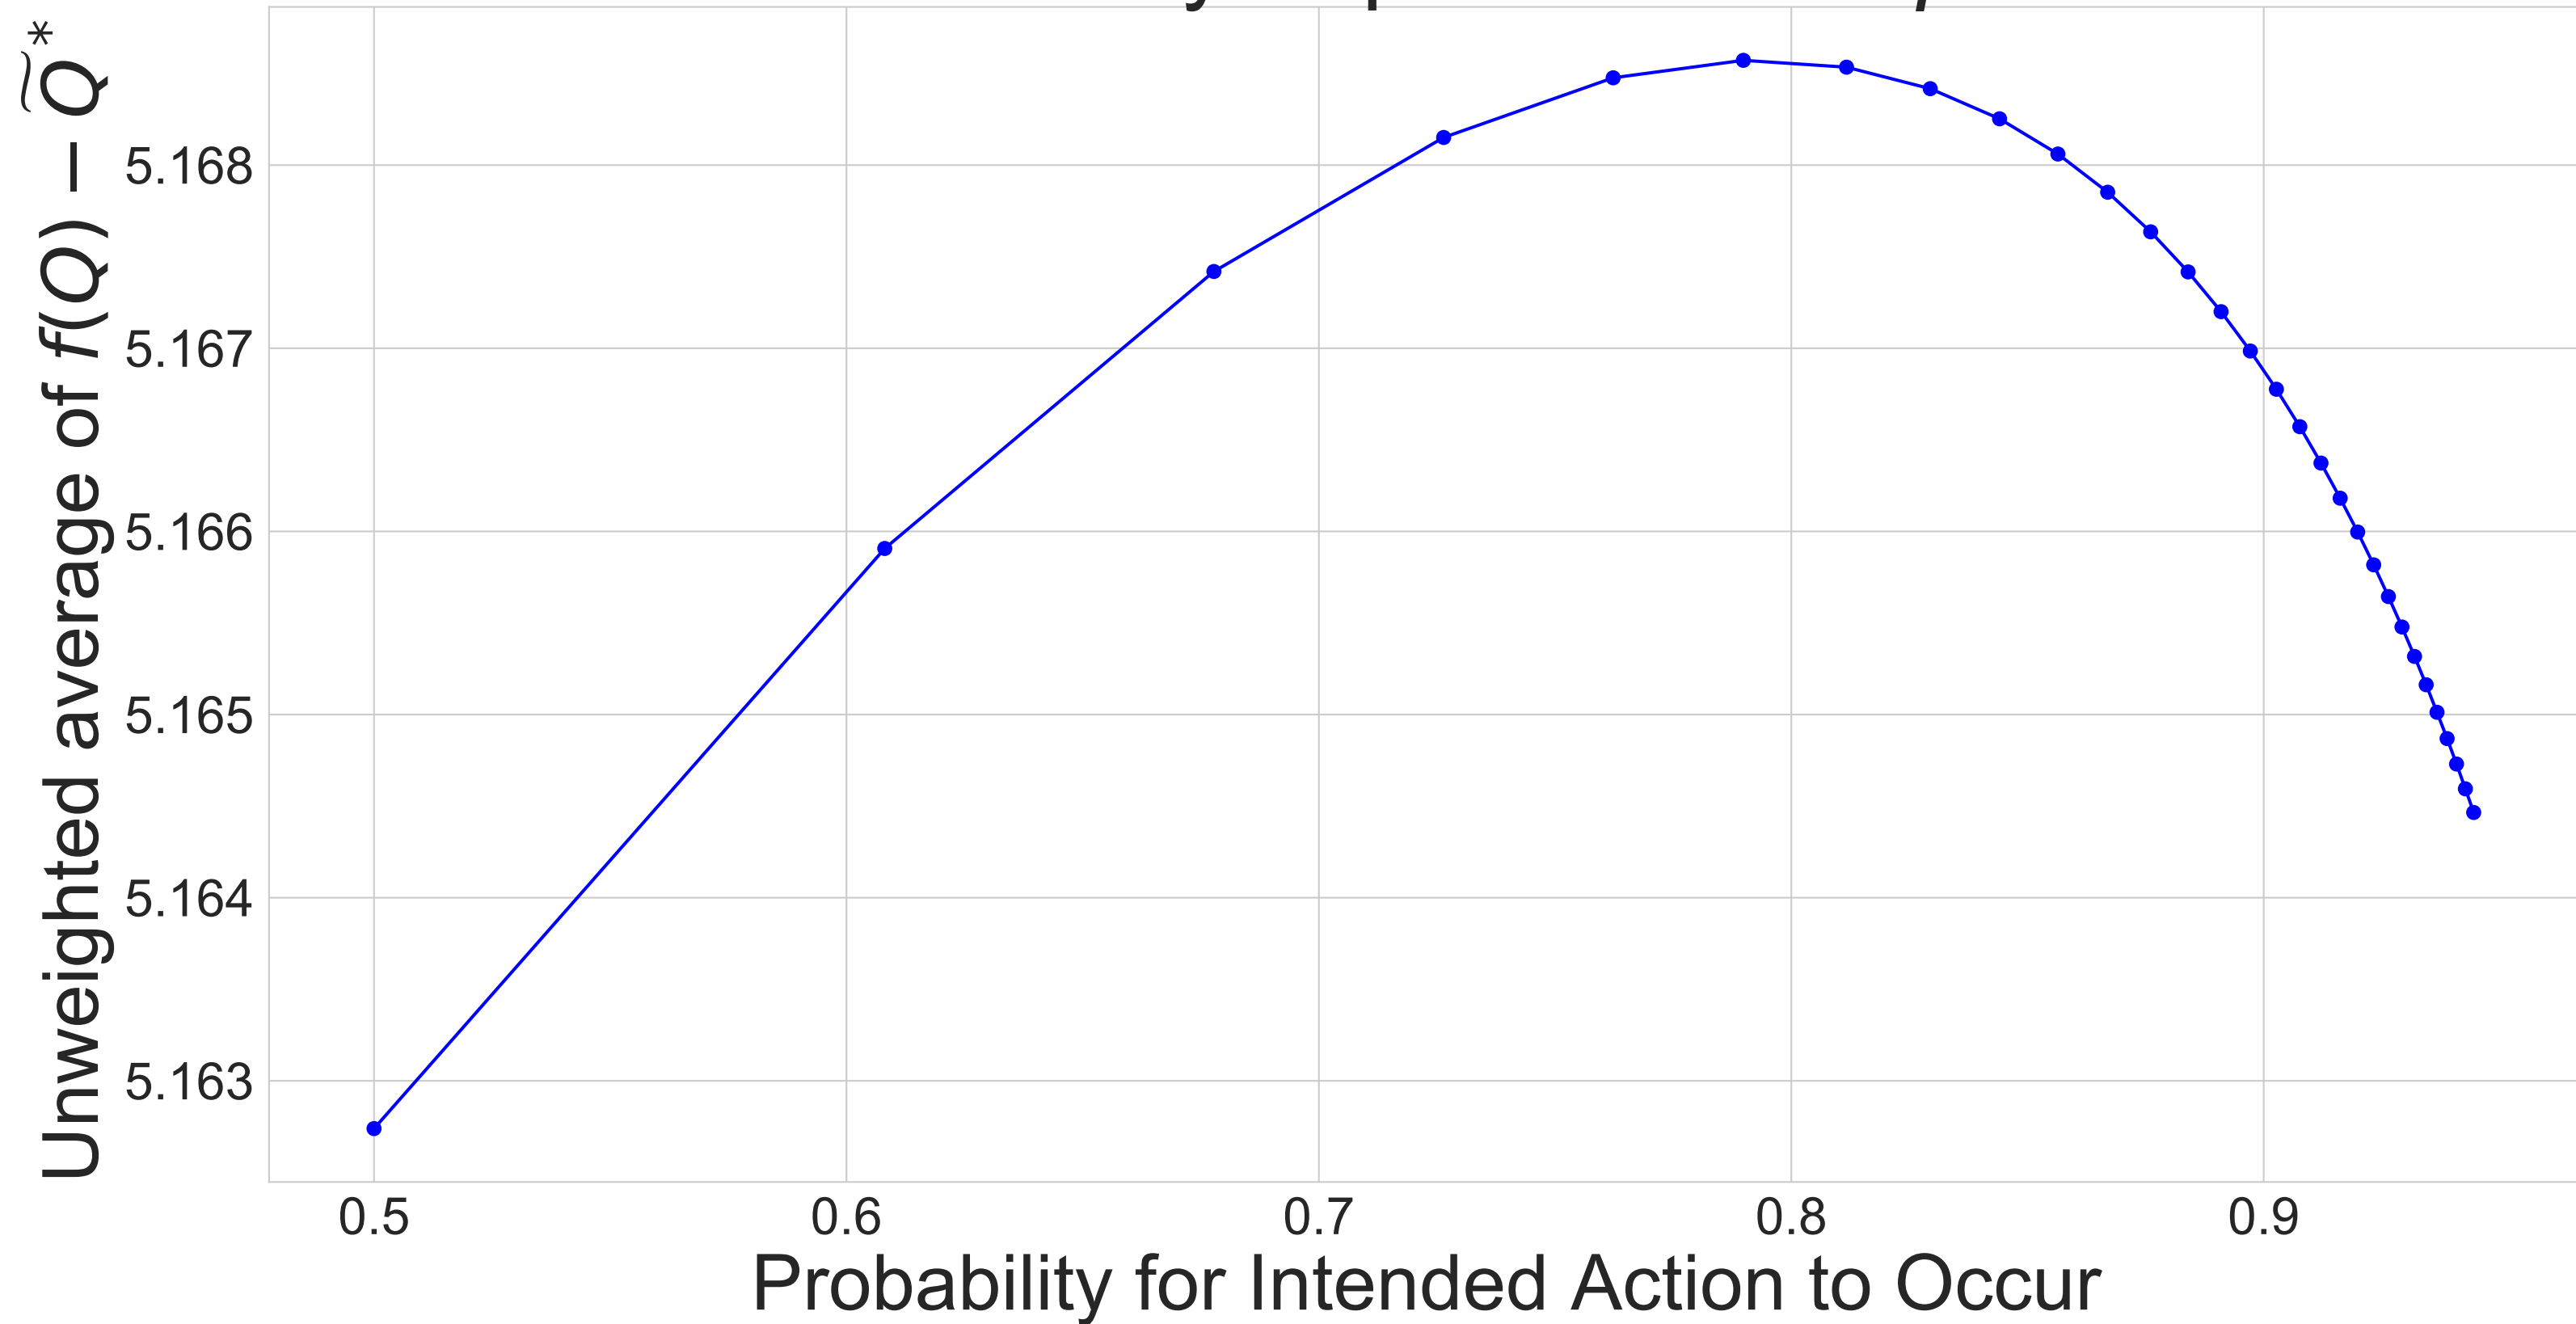

Supplement: supplementary_material [file attachment]

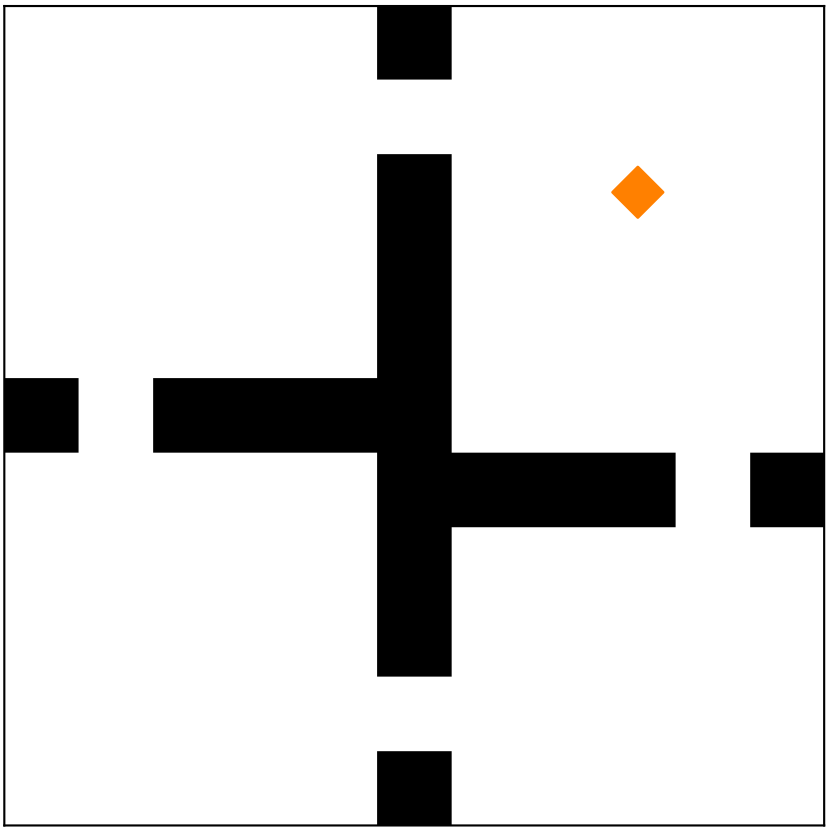

Supplement: supplementary_material [file attachment]

Task: "6x6L"

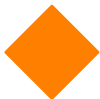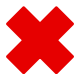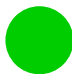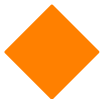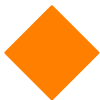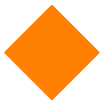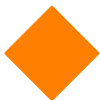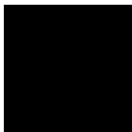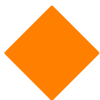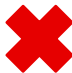

Supplement: supplementary_material [file attachment]

Average of  $f(Q) - \widetilde{Q}^*$  as a function of reward density

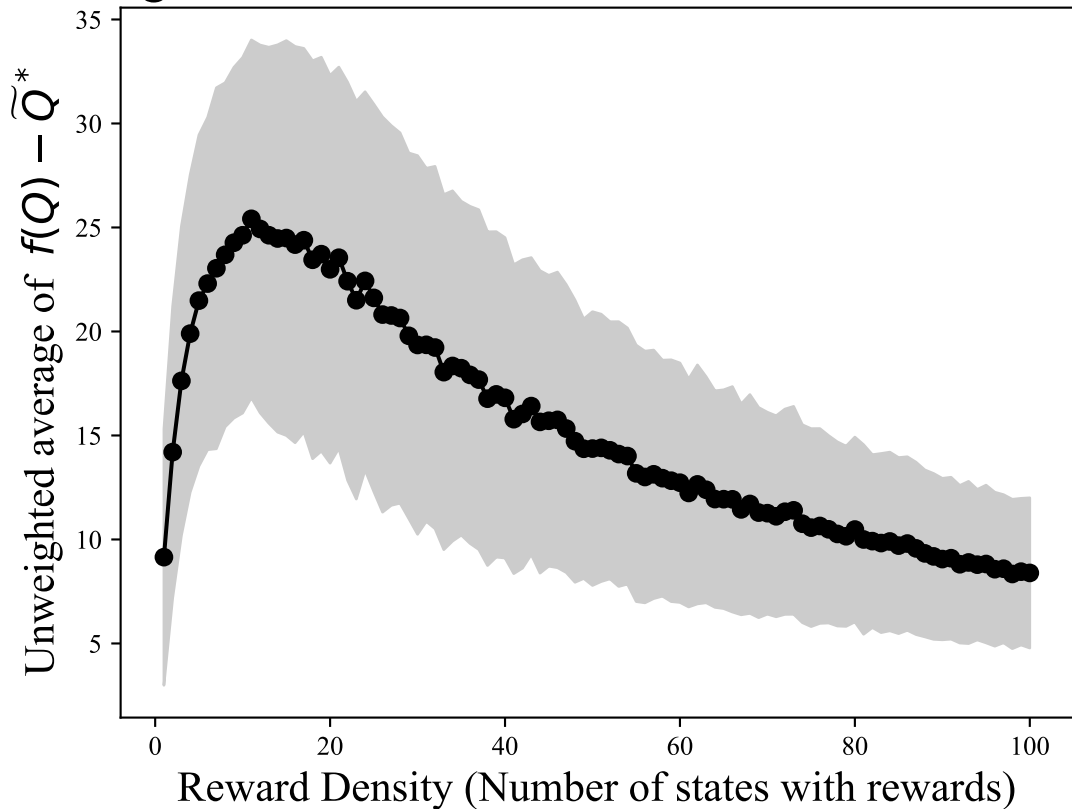

Supplement: supplementary_material [file attachment]

# KL divergence as a function of density

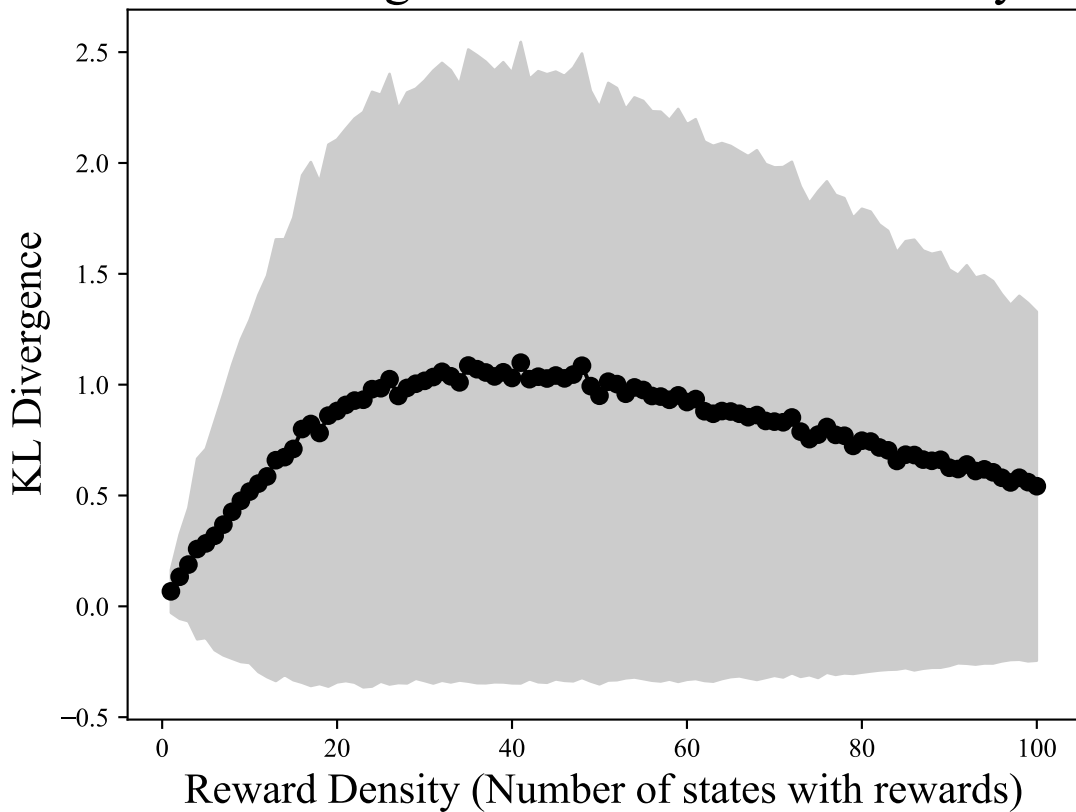

Supplement: supplementary_material [file attachment]

# KL divergence as a function of density

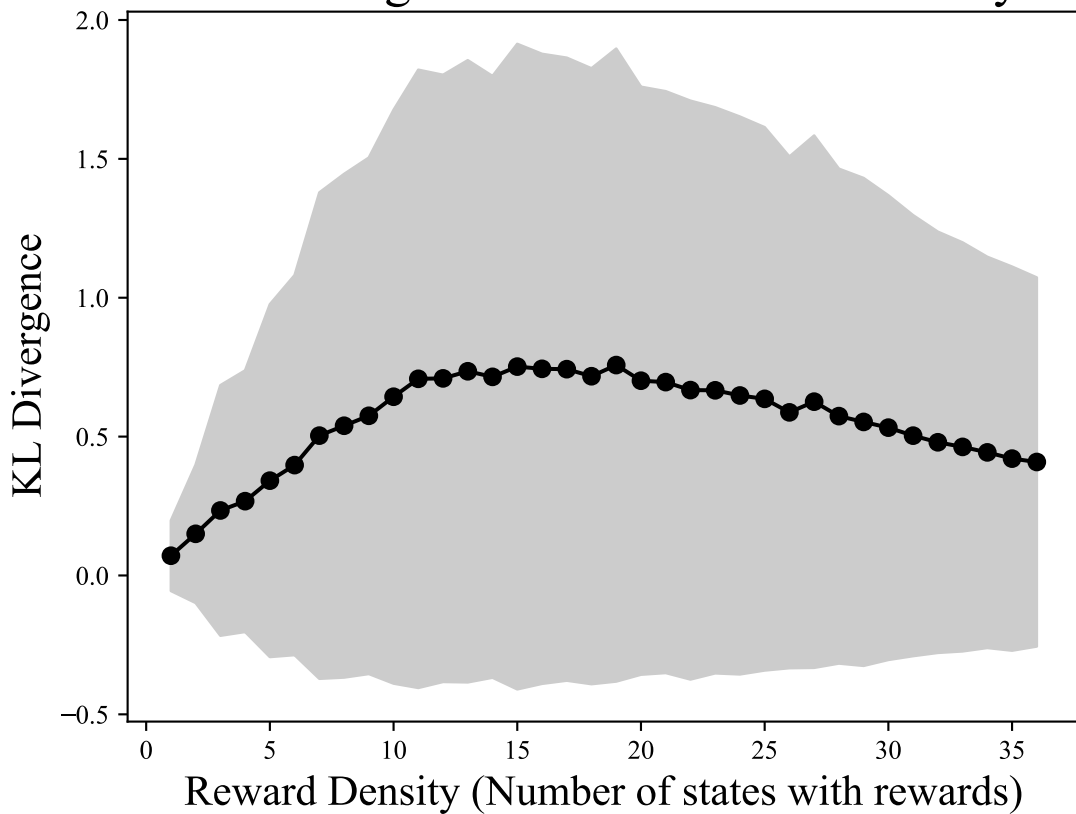

Supplement: supplementary_material [file attachment]

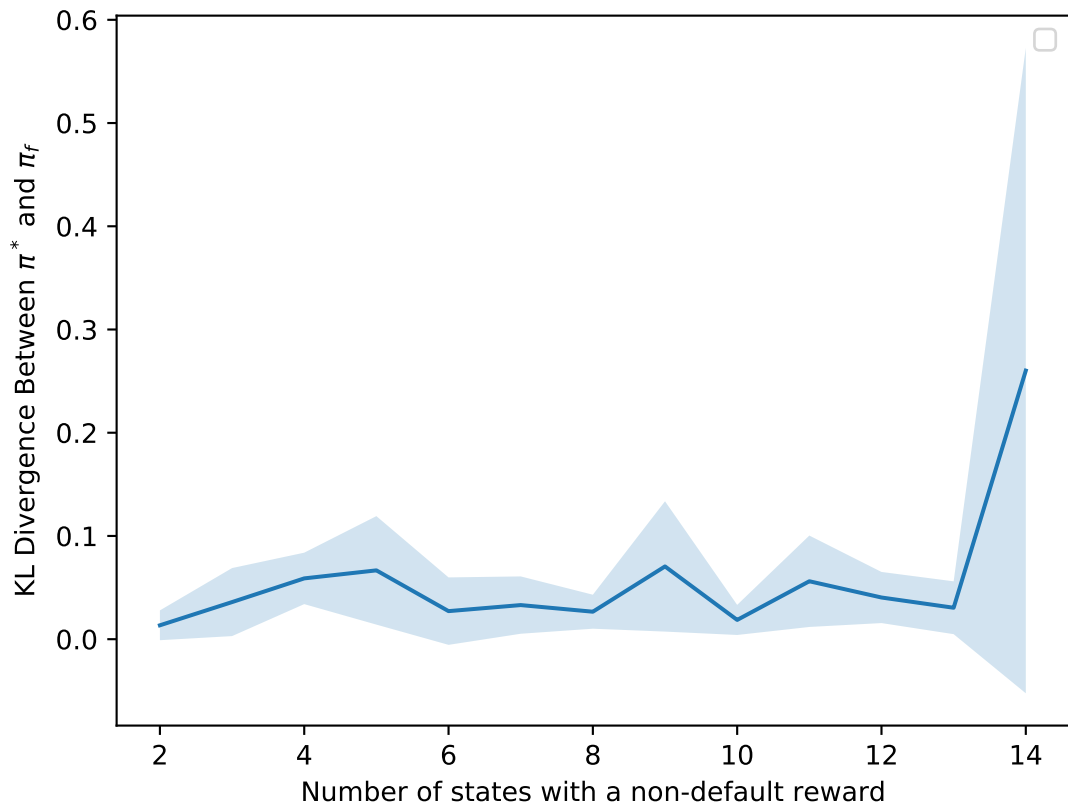

Supplement: supplementary_material [file attachment]

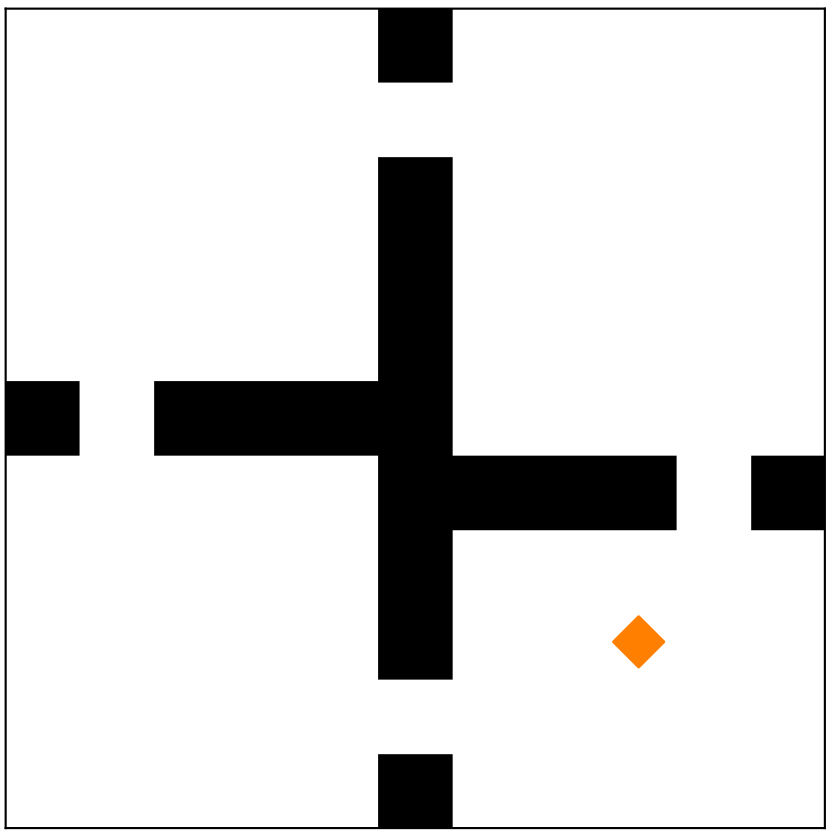

Supplement: supplementary_material [file attachment]

Task: "6x6D"

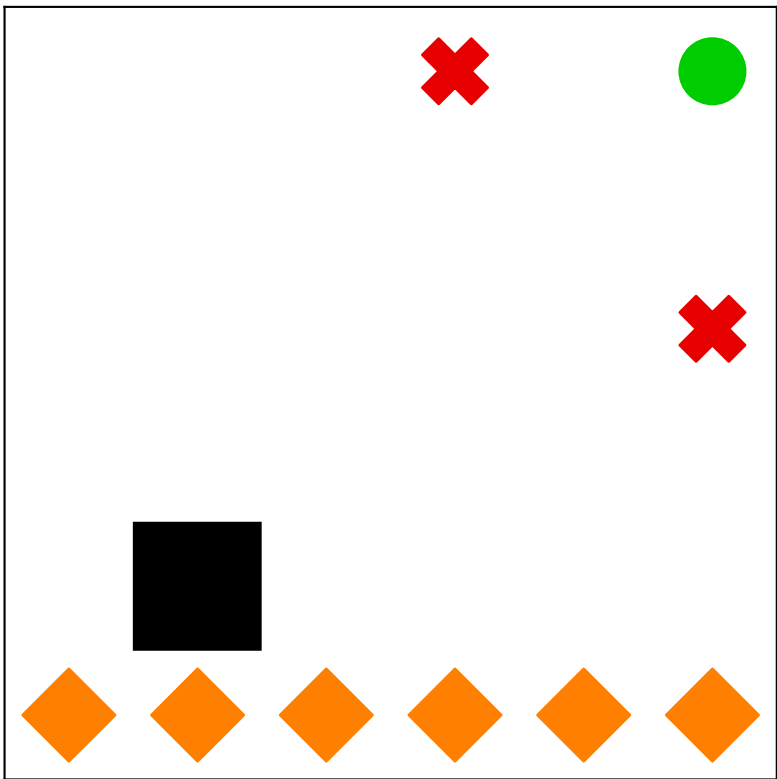

Supplement: supplementary_material [file attachment]

# Stochasticity Experiment For $\beta = 5$

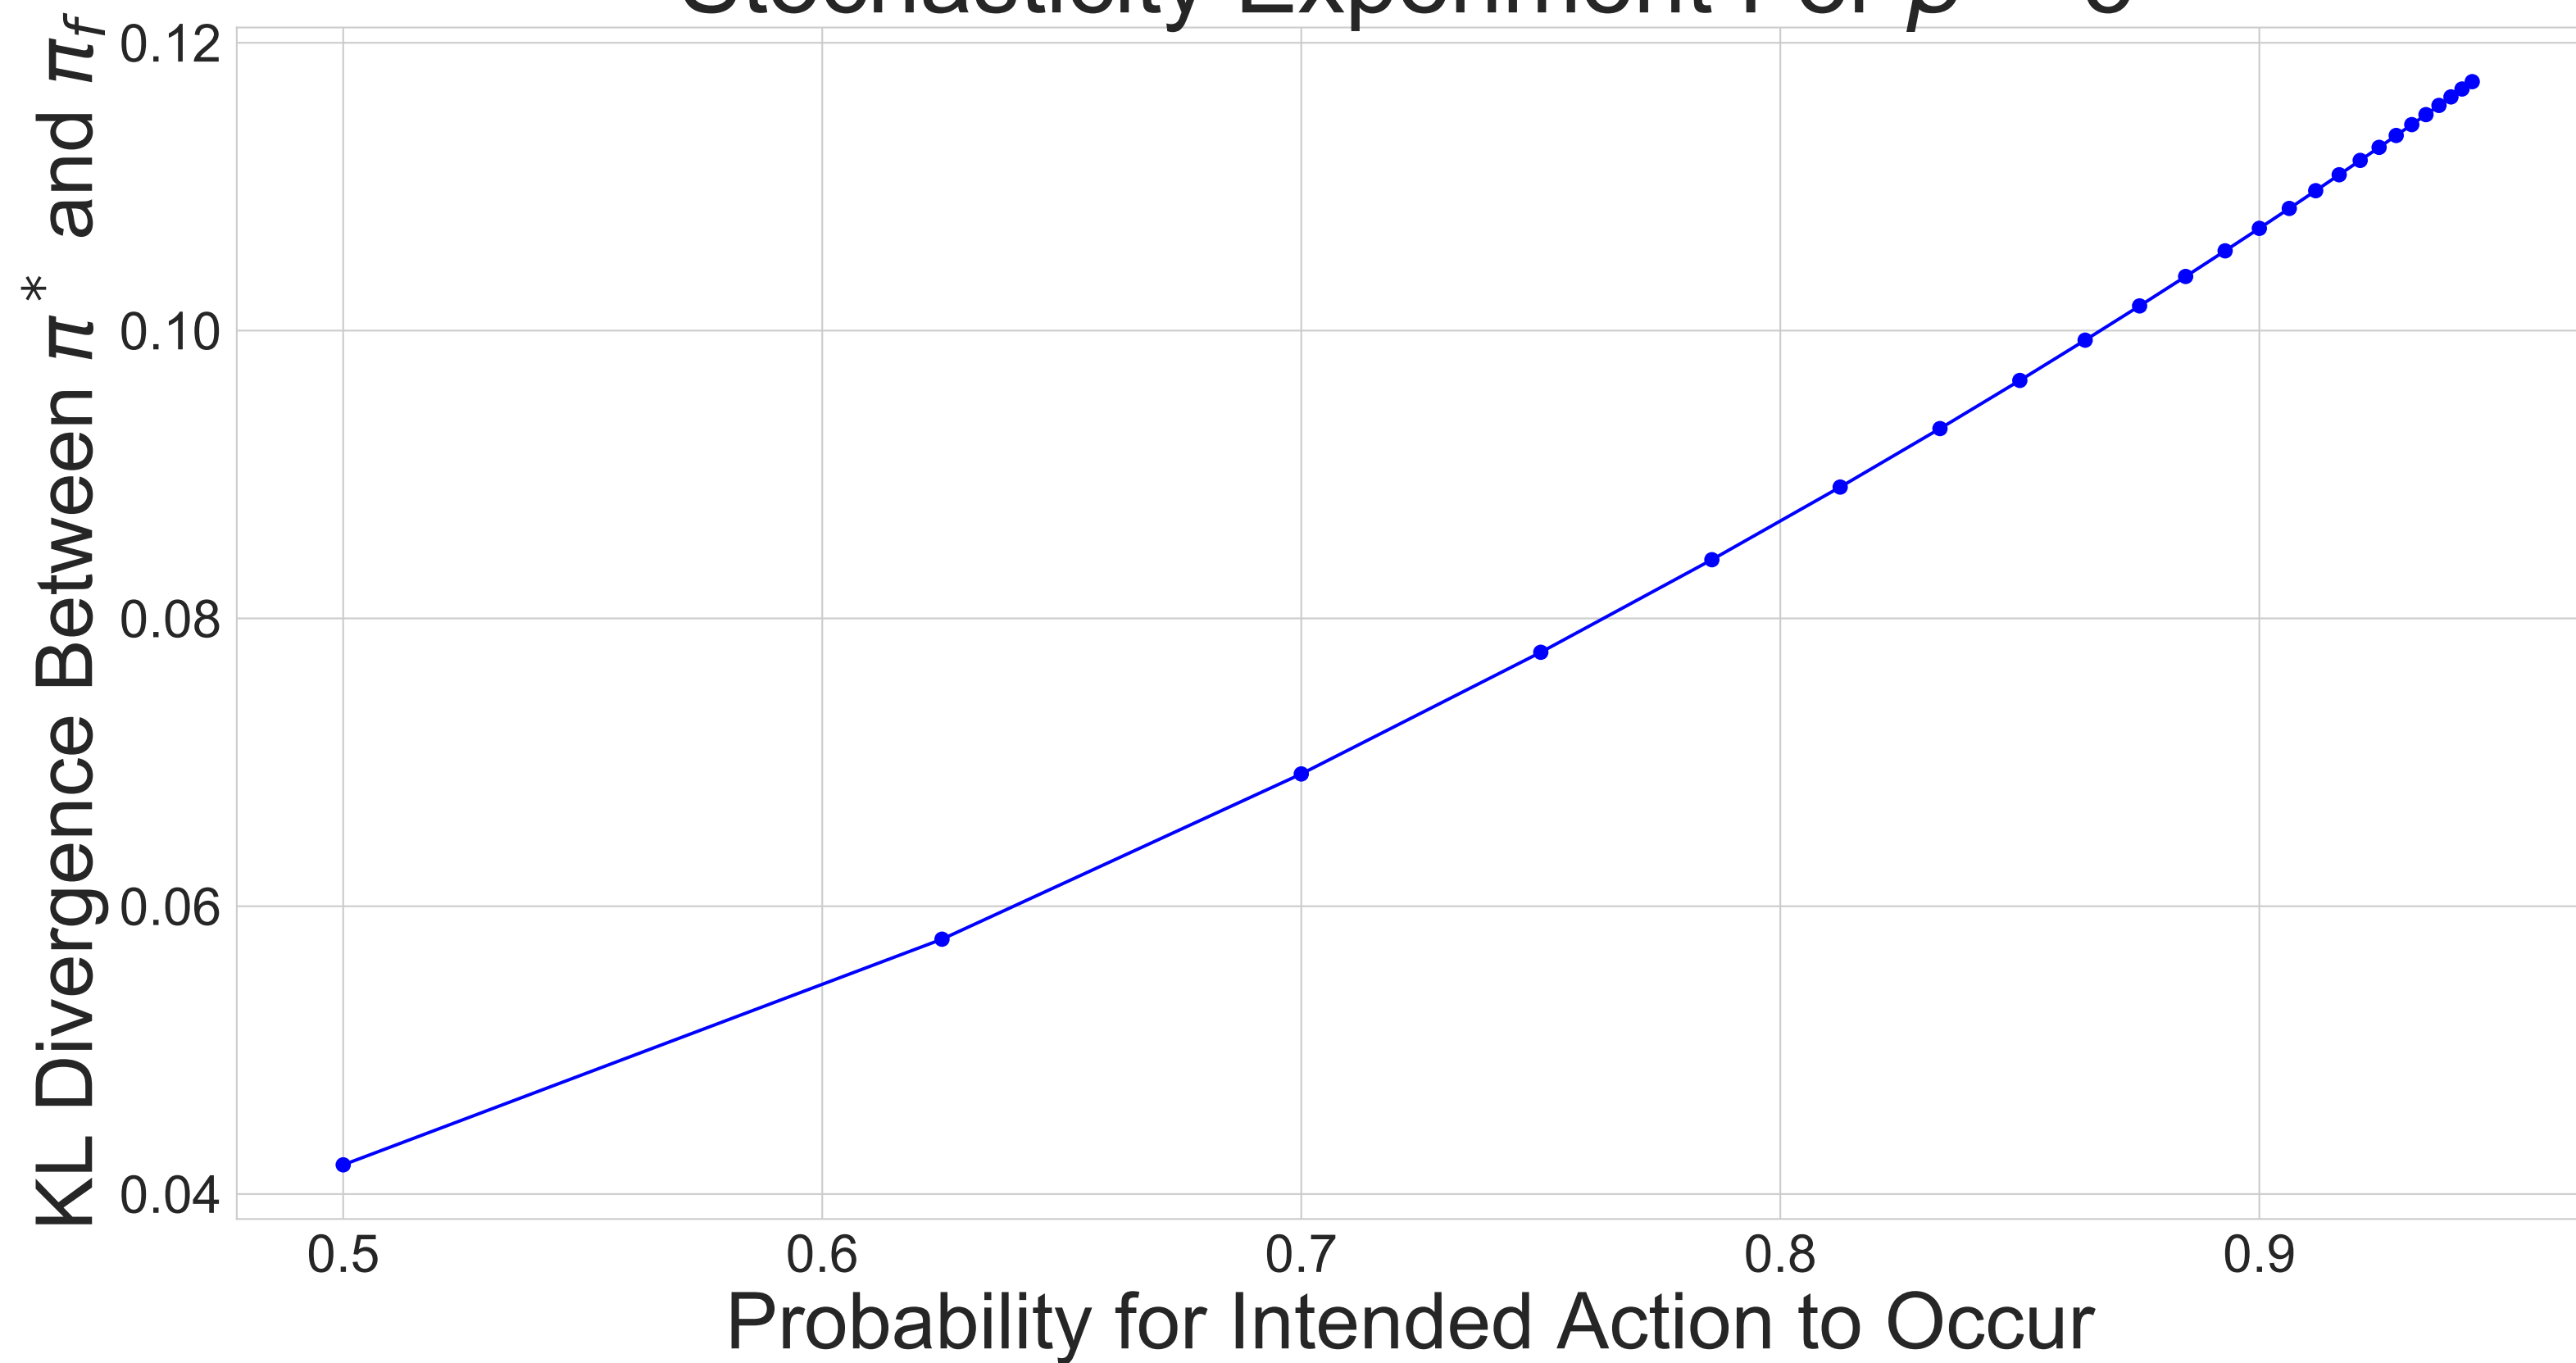

Supplement: supplementary_material [file attachment]

# Stochasticity Experiment For $\beta = 3$

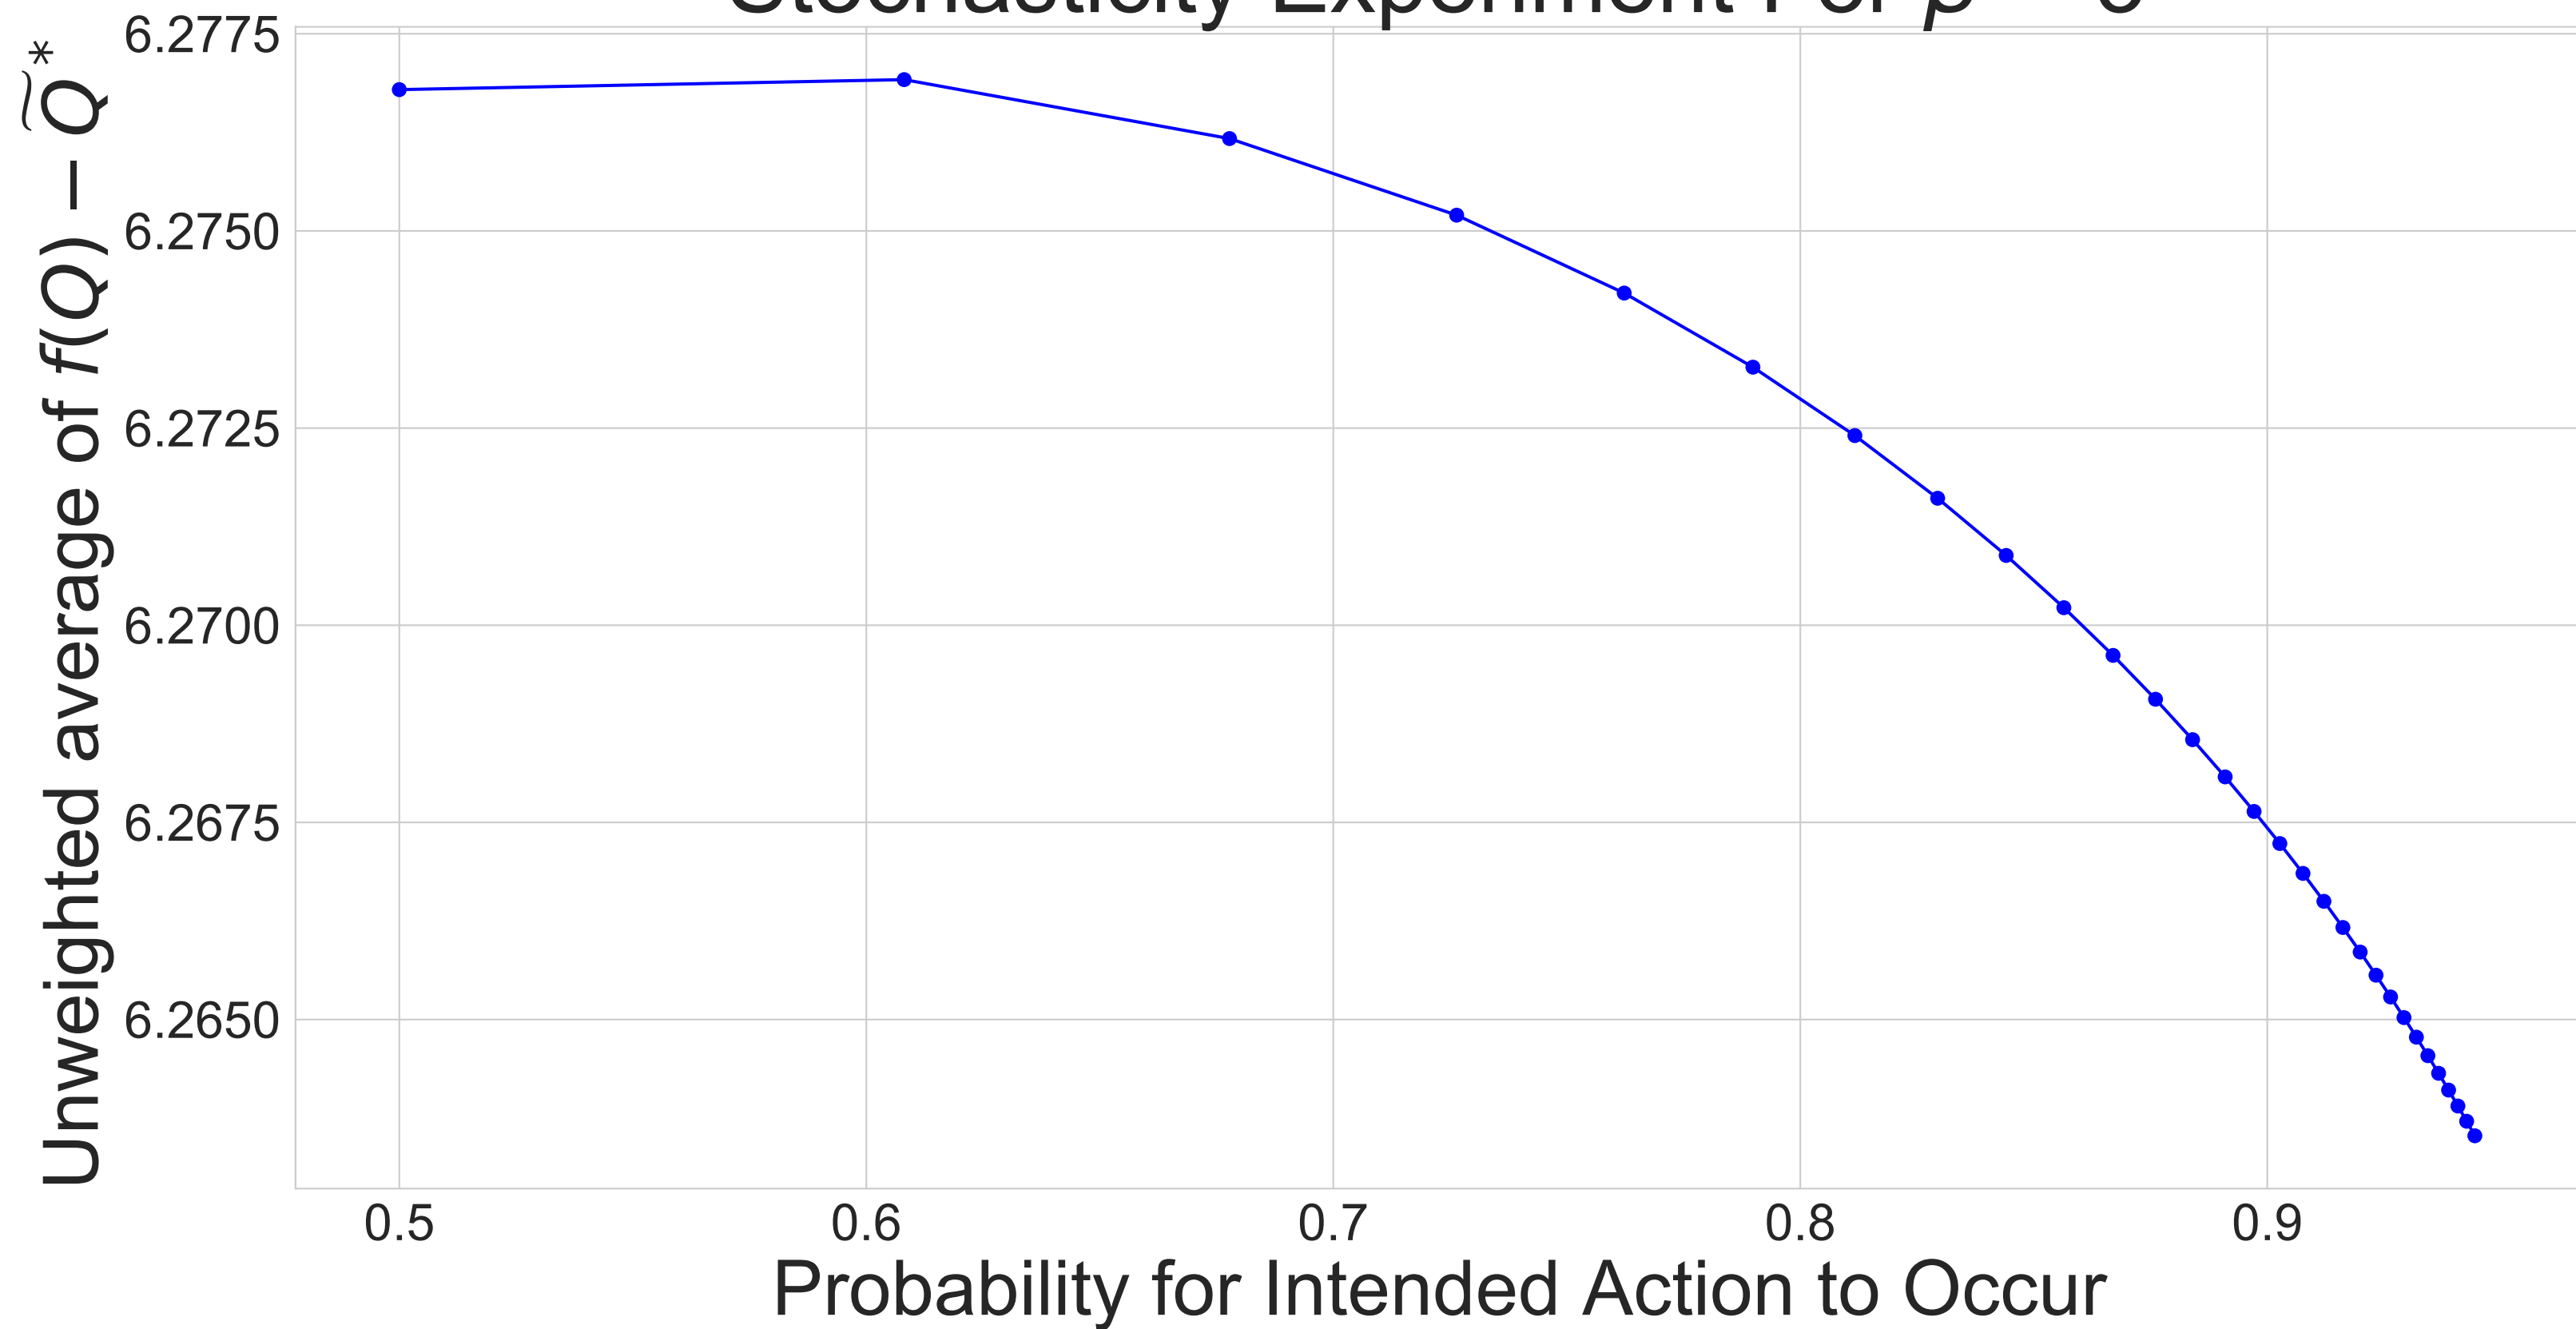

Supplement: supplementary_material [file attachment]

# Error During Training

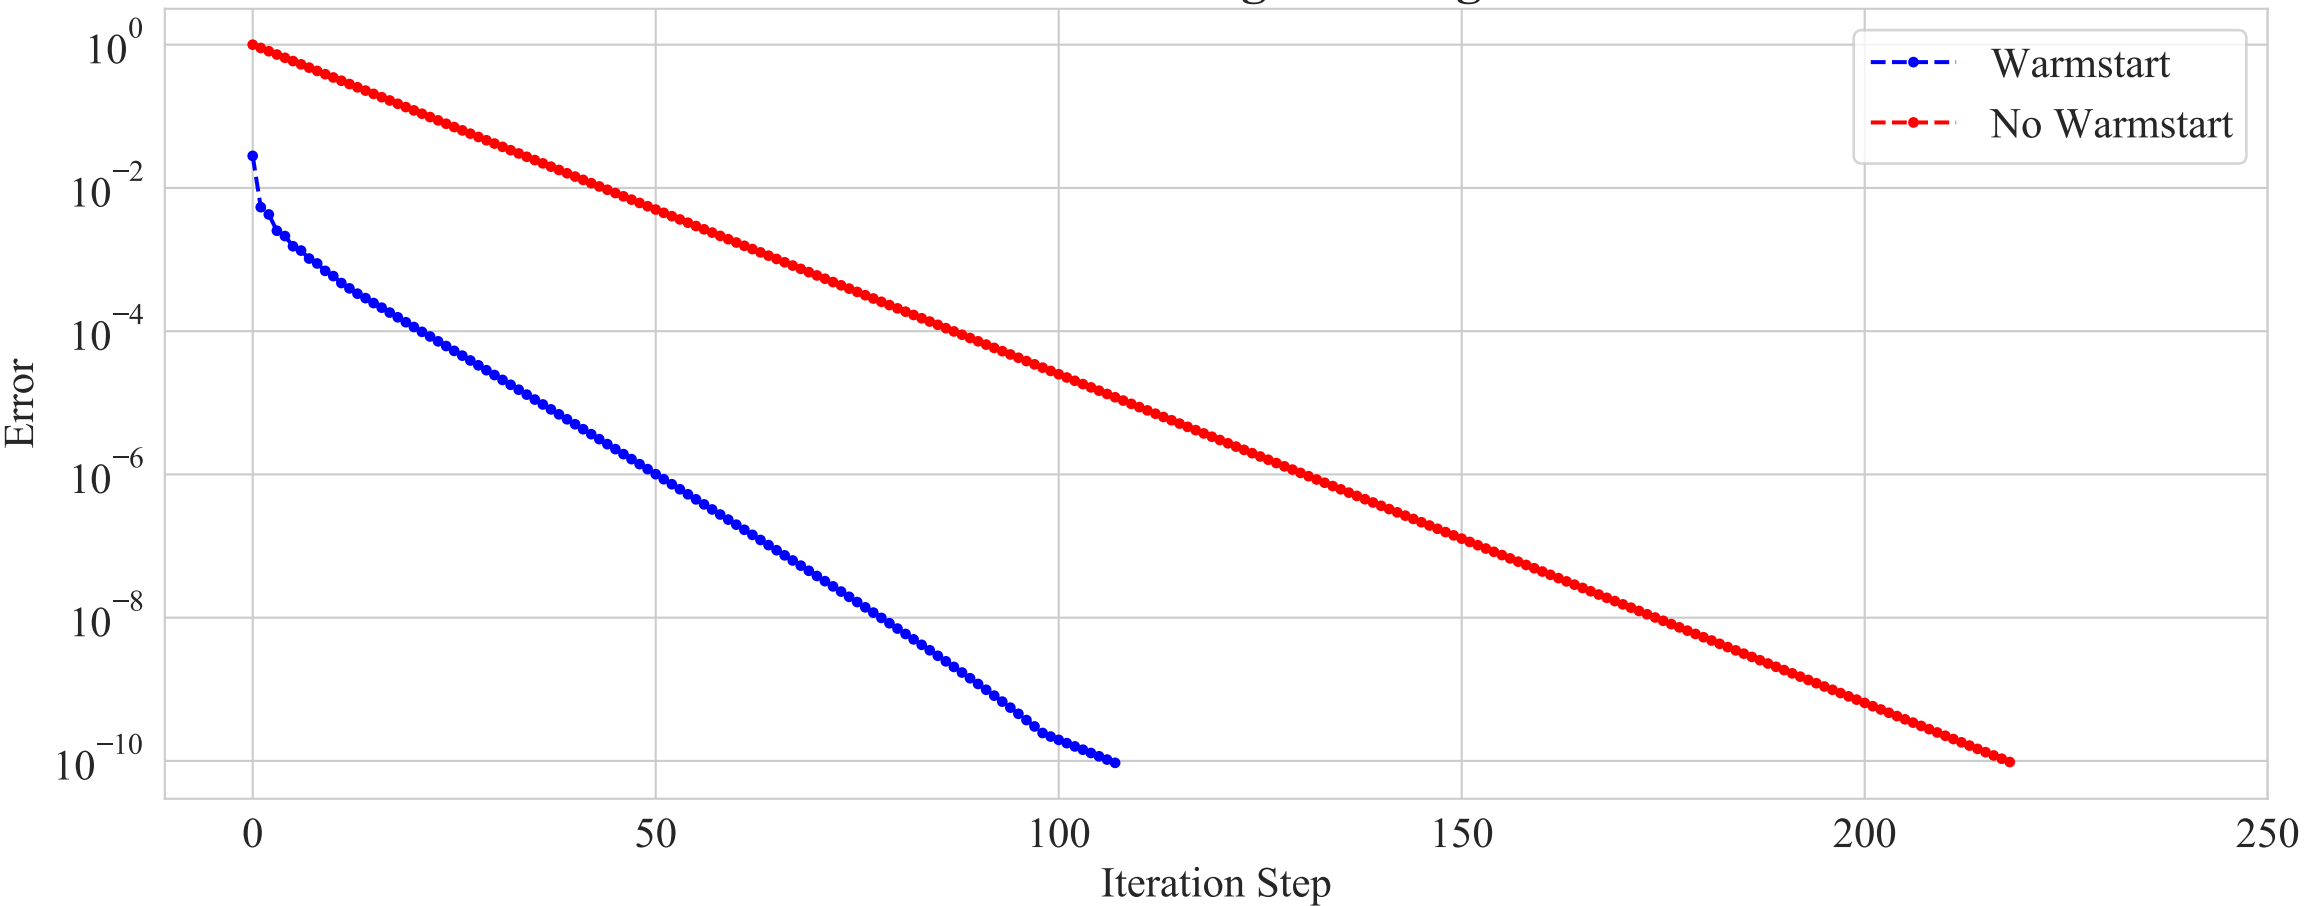

Supplement: supplementary_material [file attachment]
